# Supplementary material for: SnCl4-mediated one-pot synthesis of 2,4,5-trisubstituted thiazoles from nitro-substituted donor–acceptor cyclopropanes and thioamides
Source: Royal Society of Chemistry journal article supplement (doi:10.1039/d2ob01604d), 2022-01-01
Supplement: d2ob01604d1.pdf [file d2ob01604d1.pdf]

## Electronic Supplementary Information

### **SnCl<sub>4</sub>-Mediated One-Pot Synthesis of 2,4,5-Trisubstituted Thiazoles from Nitro-Substituted Donor-Acceptor Cyclopropanes and Thioamides**

Maniarasu Meenakshi and Kannupal Srinivasan\*

School of Chemistry, Bharathidasan University, Tiruchirappalli-620 024, Tamil Nadu, India

[srinivasank@bdu.ac.in](mailto:srinivasank@bdu.ac.in)

#### **Table of Contents**

|                                                                                                              |      |
|--------------------------------------------------------------------------------------------------------------|------|
| A. Copies of <sup>1</sup> H and <sup>13</sup> C NMR spectra for all products <b>8a-p</b> and <b>10</b> ..... | 2-35 |
| B. ORTEP plot of the crystal structure of <b>8o</b> .....                                                    | 36   |

## A. Copies of $^1\text{H}$ NMR and $^{13}\text{C}$ NMR Spectra

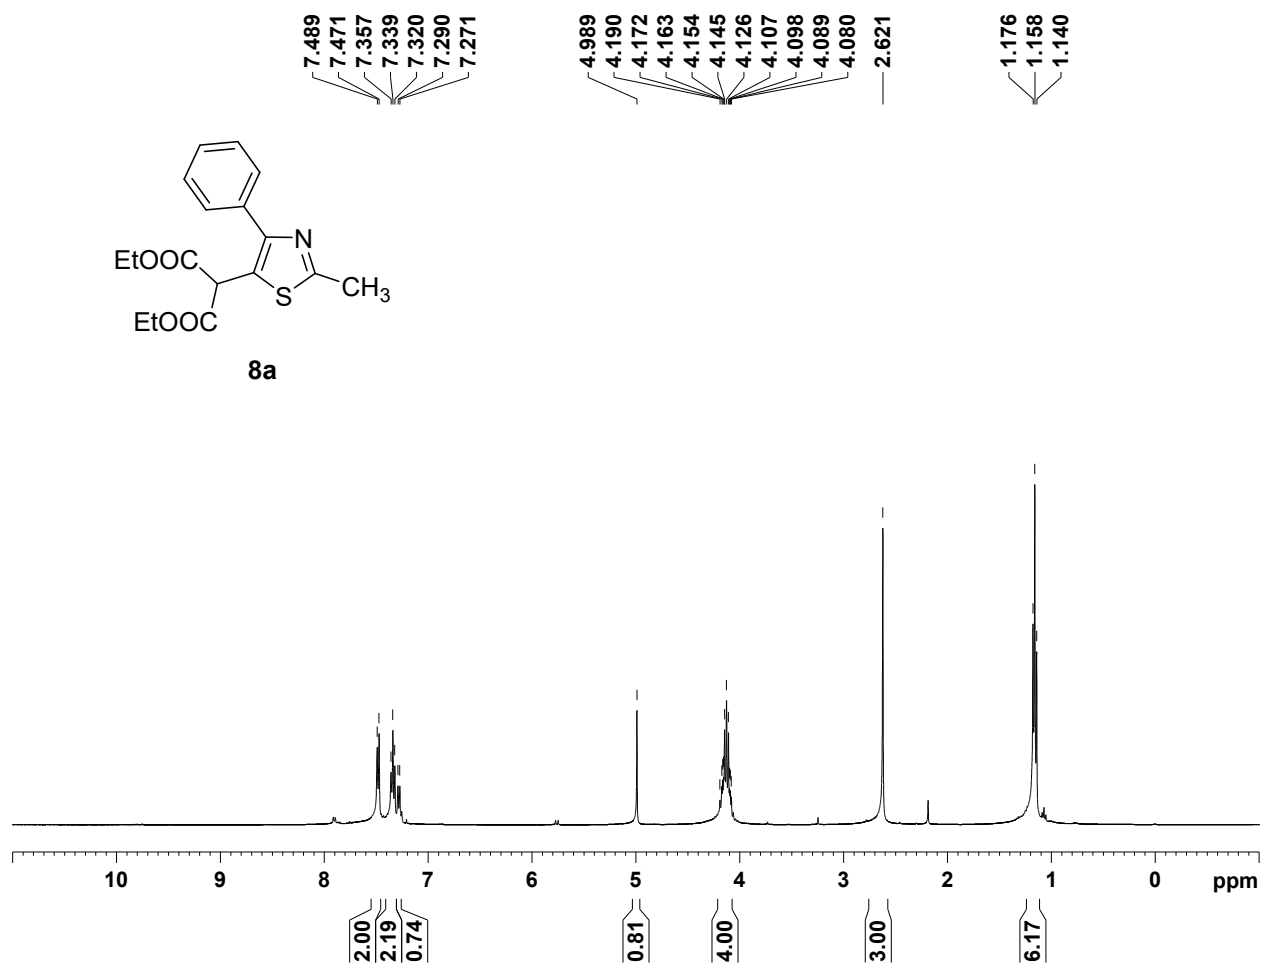

Figure 1.  $^1\text{H}$  NMR (400 MHz,  $\text{CDCl}_3$ ) spectrum of **8a**

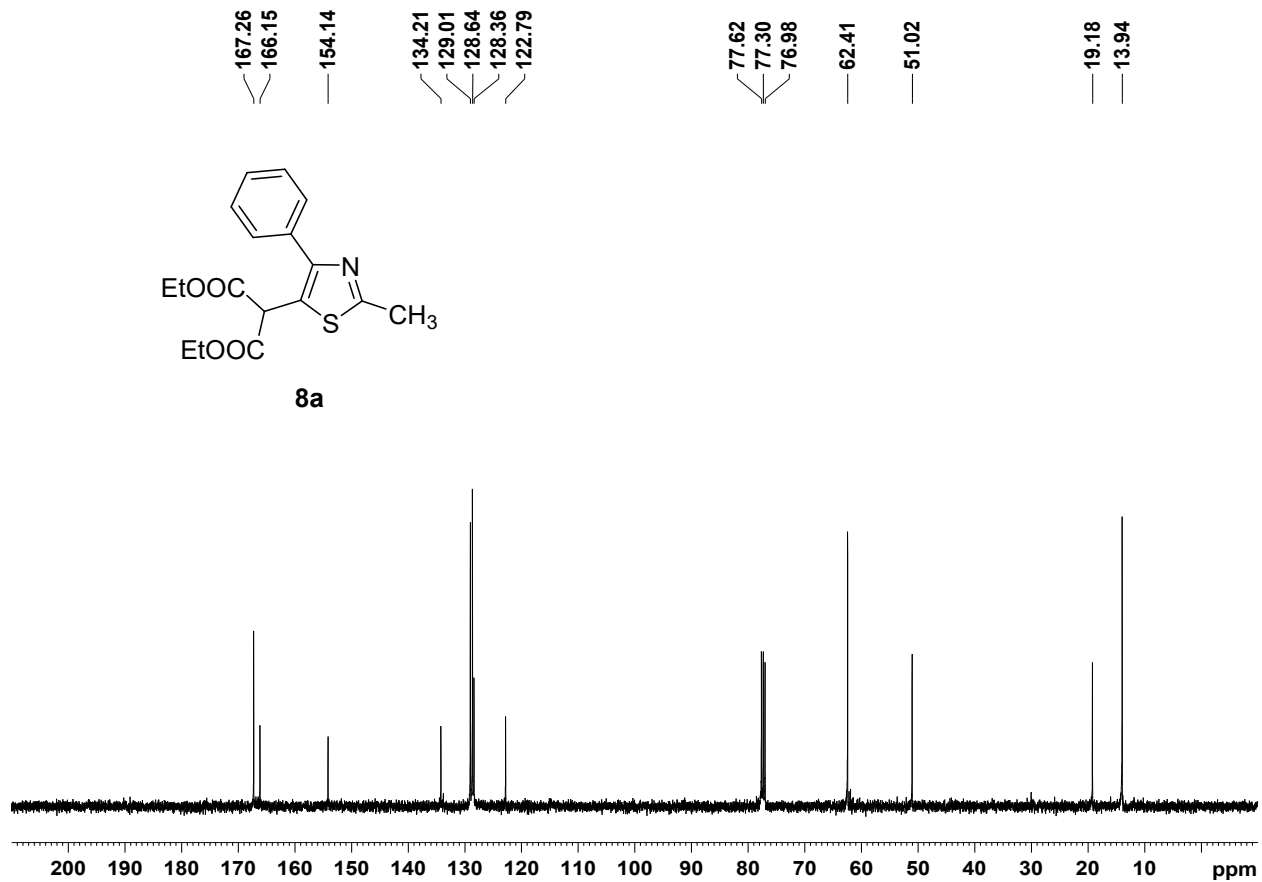

**Figure 2.**  $^{13}\text{C}$  NMR (100 MHz,  $\text{CDCl}_3$ ) spectrum of **8a**

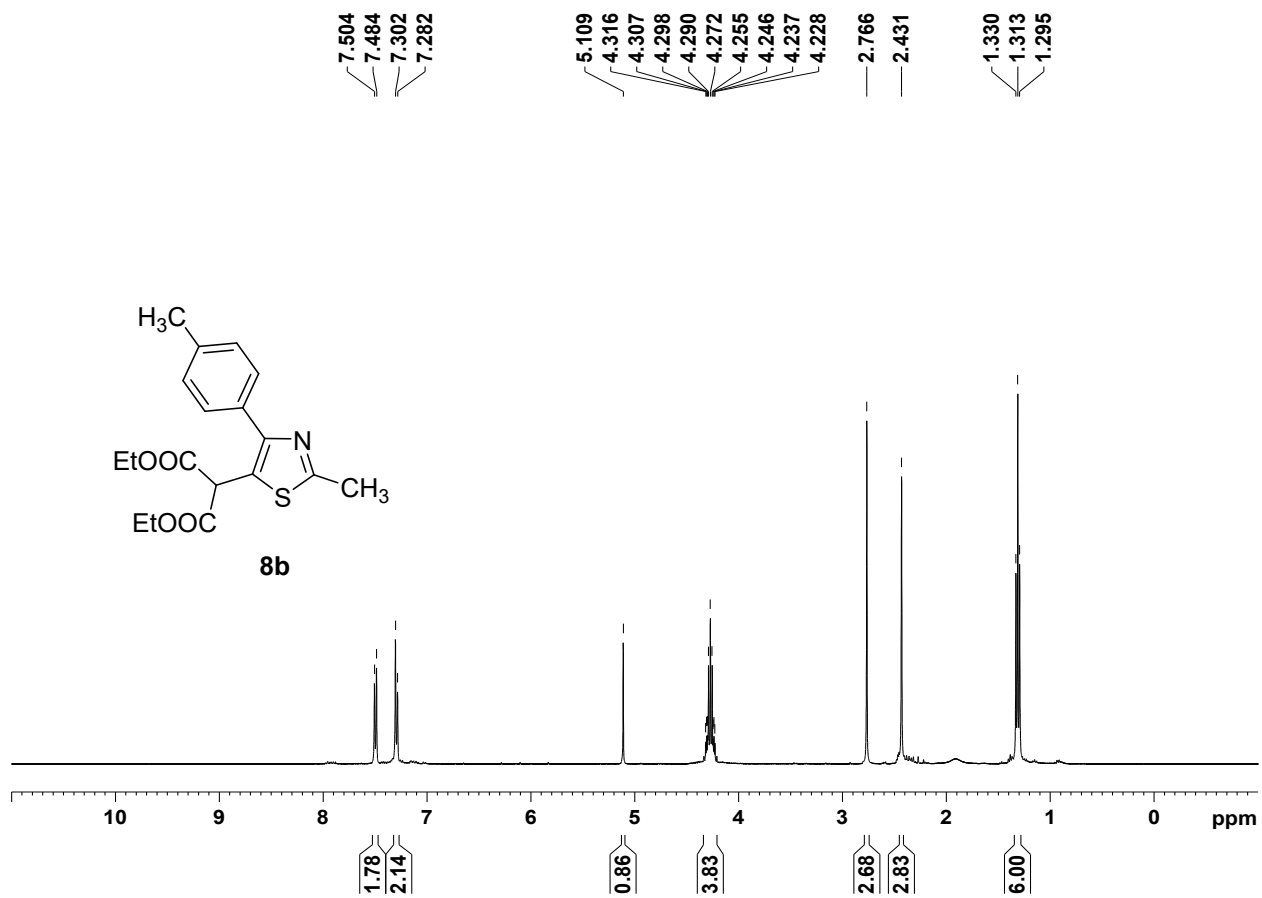

Figure 3. <sup>1</sup>H NMR (400 MHz, CDCl<sub>3</sub>) spectrum of **8b**

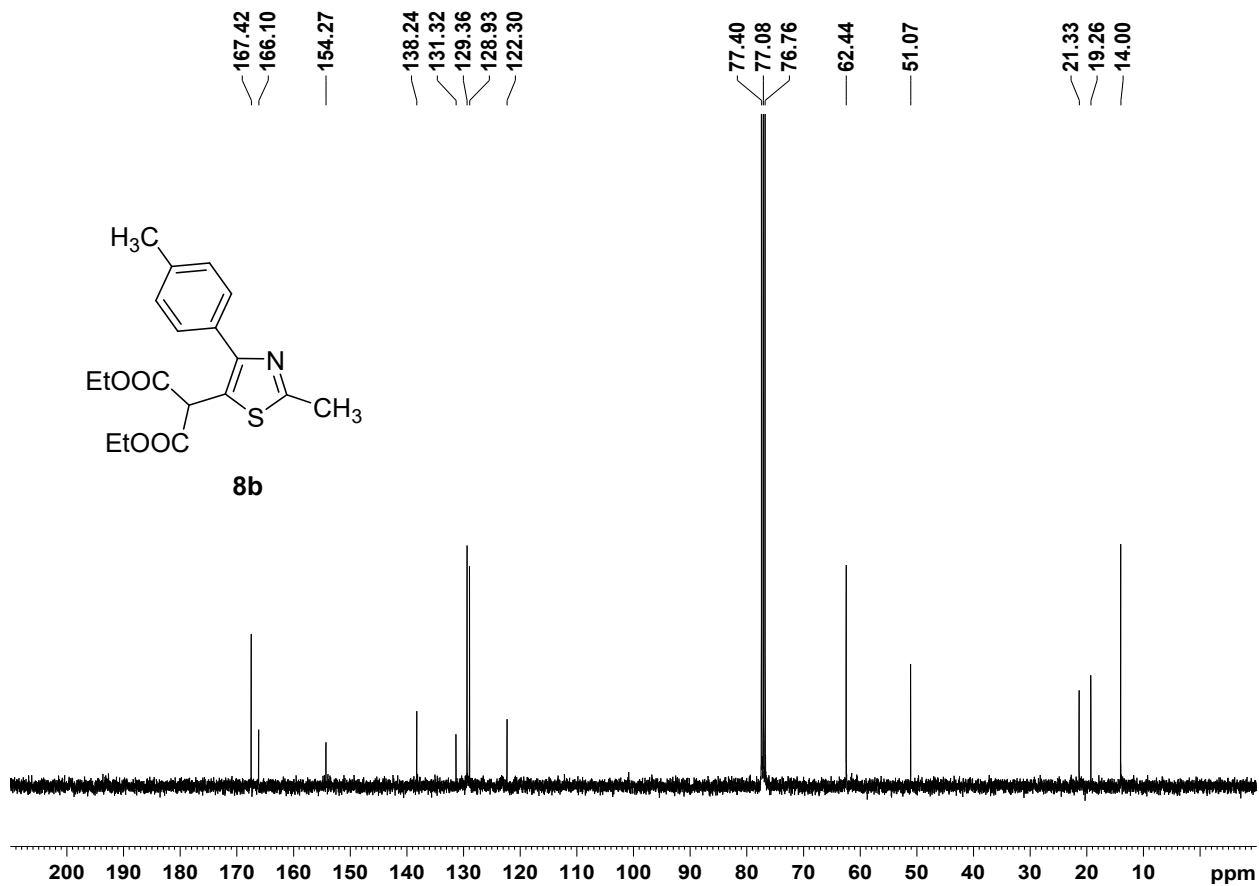

**Figure 4.** <sup>13</sup>C NMR (100 MHz, CDCl<sub>3</sub>) spectrum of **8b**

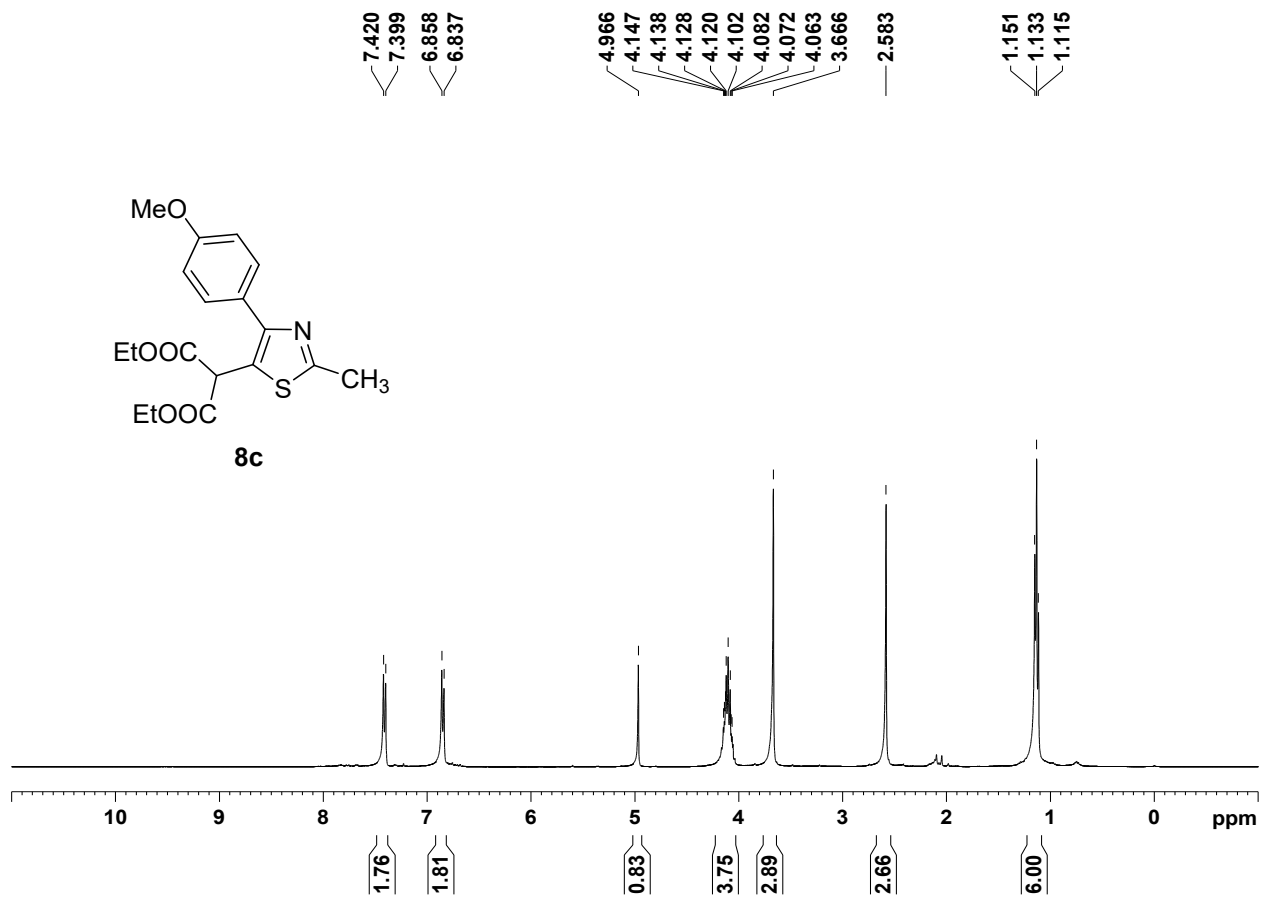

Figure 5. <sup>1</sup>H NMR (400 MHz, CDCl<sub>3</sub>) spectrum of **8c**

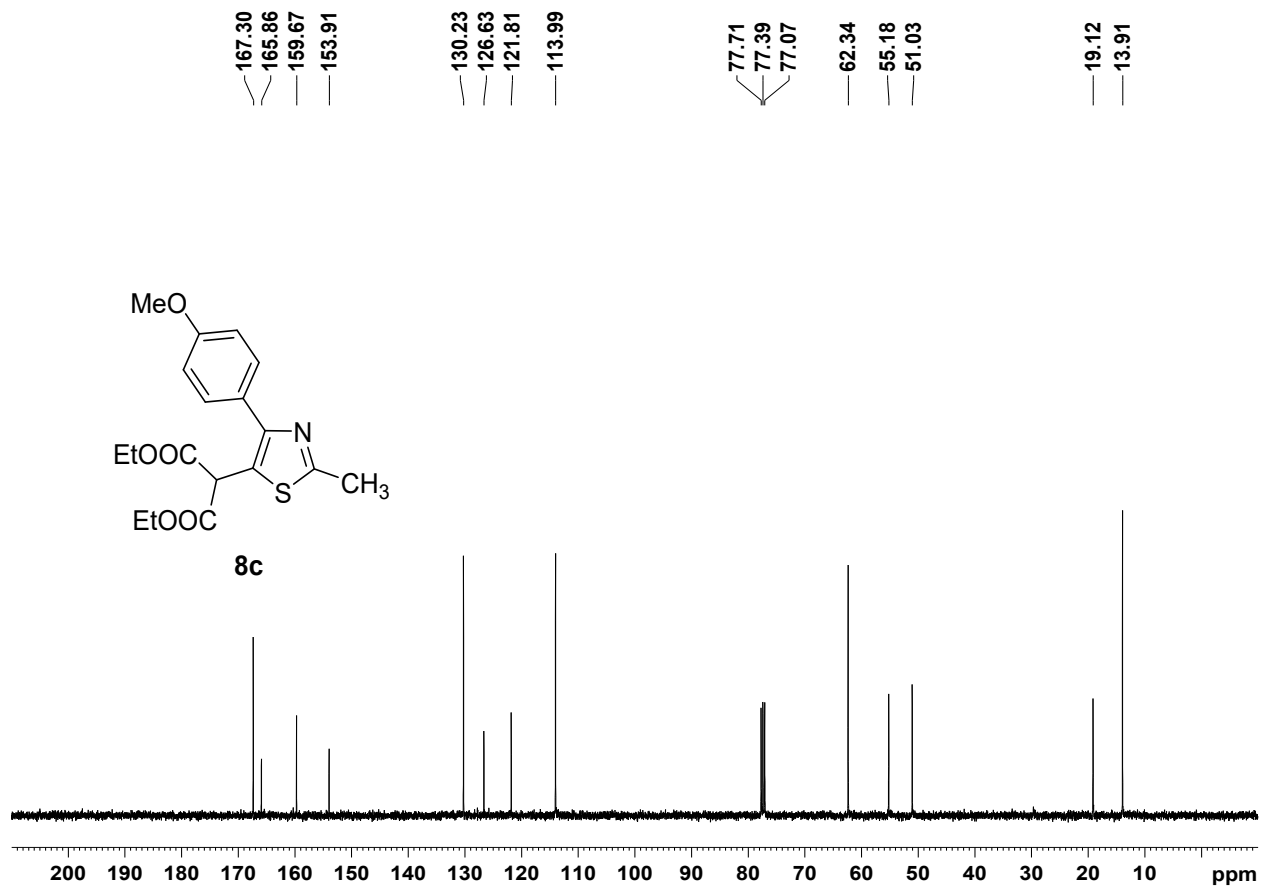

**Figure 6.** <sup>13</sup>C NMR (100 MHz, CDCl<sub>3</sub>) spectrum of **8c**

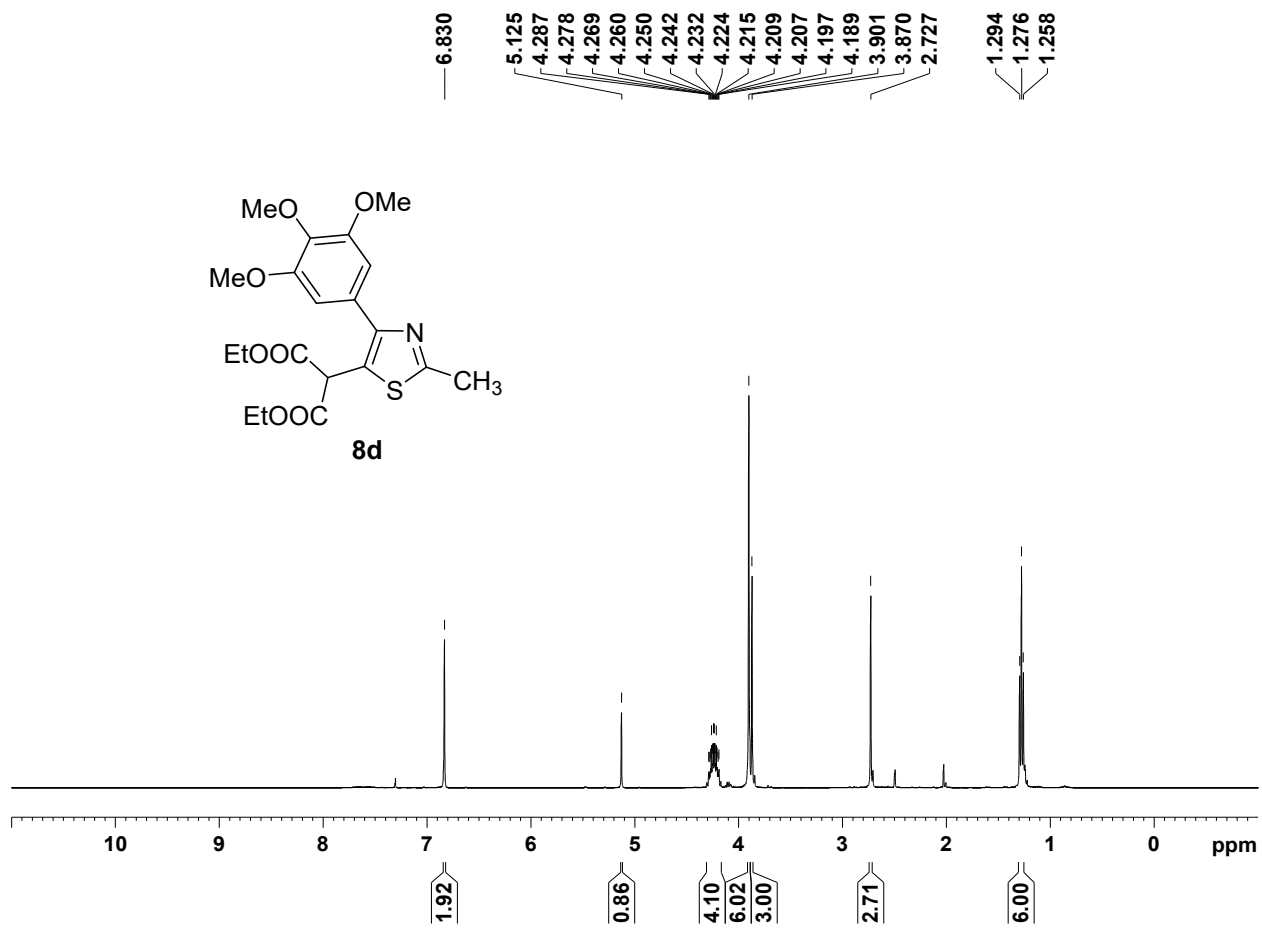

Figure 7. <sup>1</sup>H NMR (400 MHz, CDCl<sub>3</sub>) spectrum of **8d**



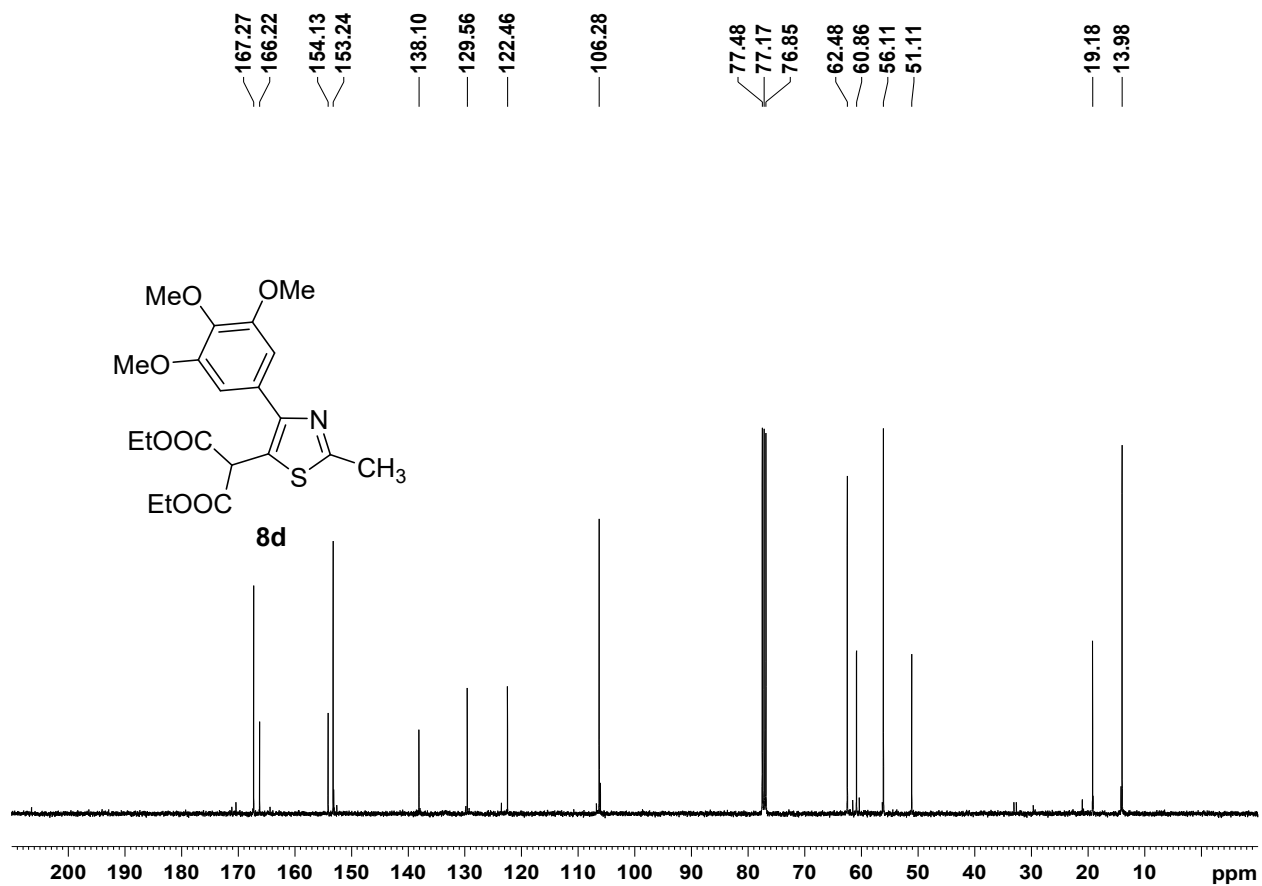

**Figure 8.**  $^{13}\text{C}$  NMR (100 MHz,  $\text{CDCl}_3$ ) spectrum of **8d**

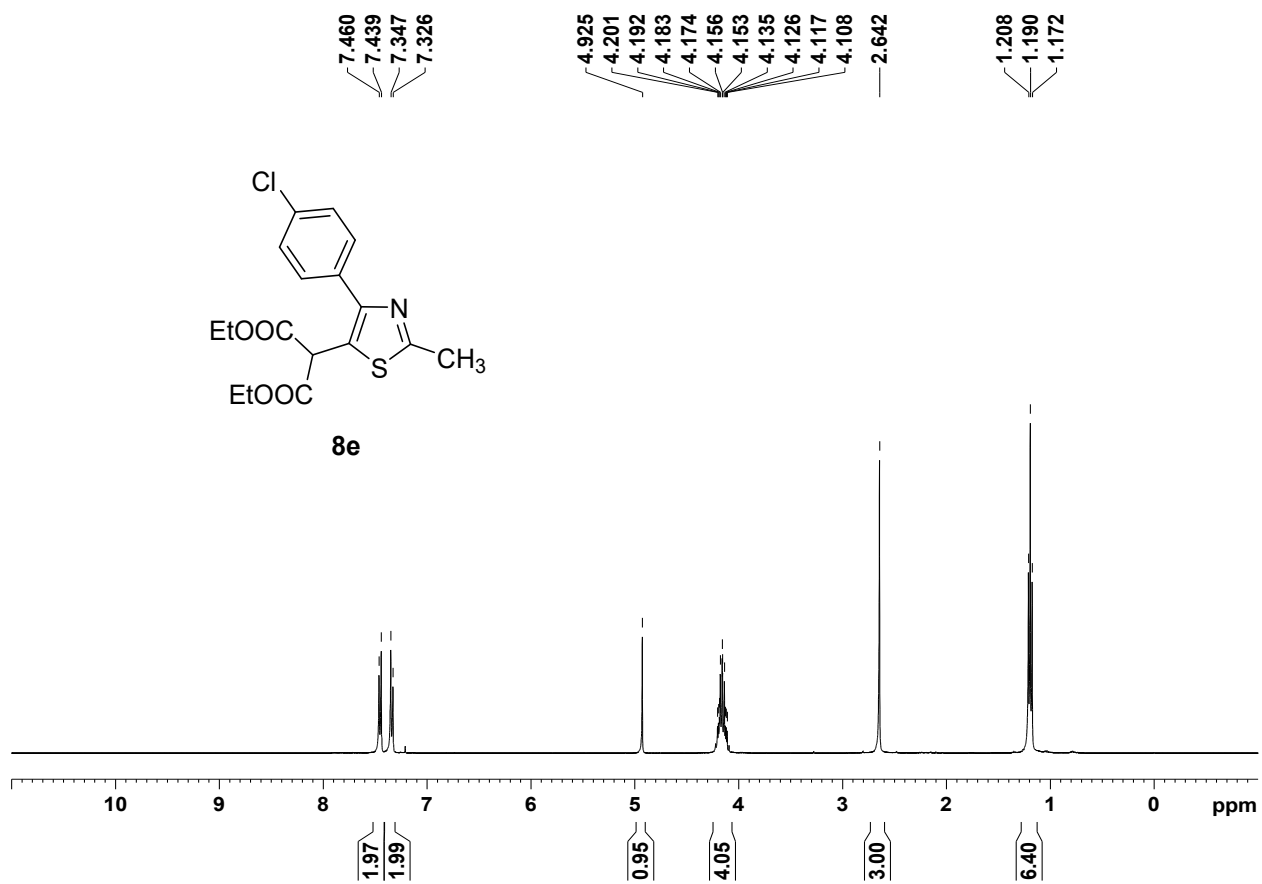

Figure 9. <sup>1</sup>H NMR (400 MHz, CDCl<sub>3</sub>) spectrum of **8e**

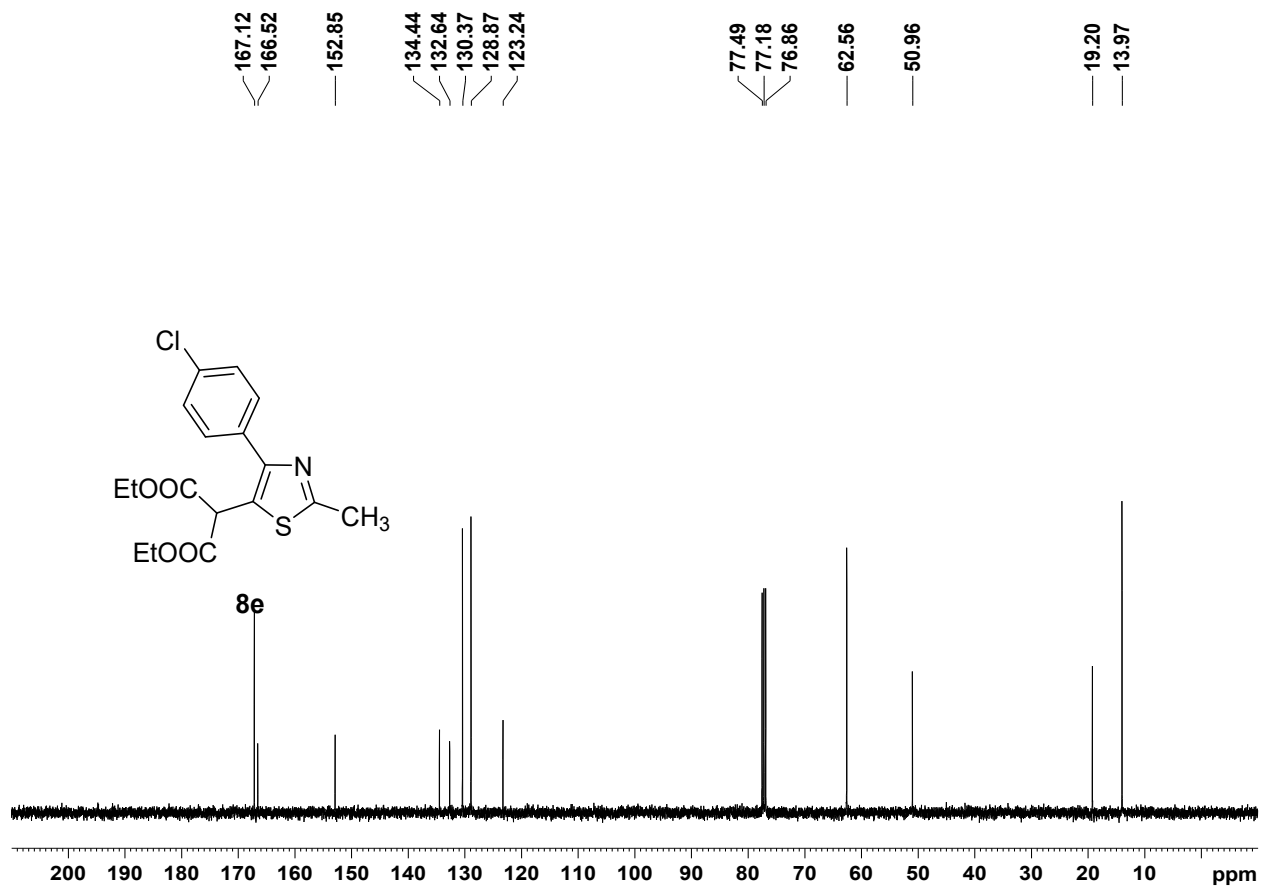

Figure 10.  $^{13}\text{C}$  NMR (100 MHz,  $\text{CDCl}_3$ ) spectrum of **8e**

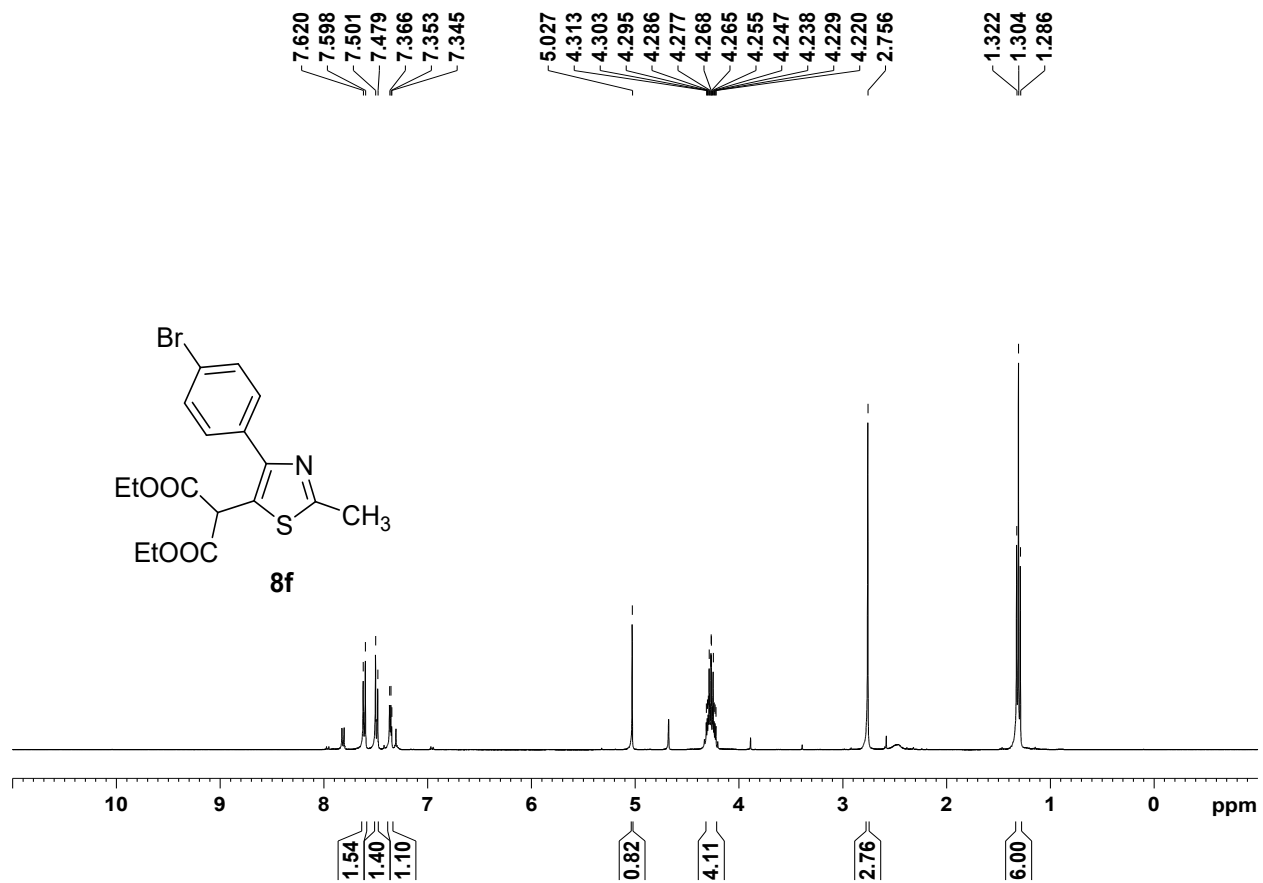

Figure 11. <sup>1</sup>H NMR (400 MHz, CDCl<sub>3</sub>) spectrum of **8f**

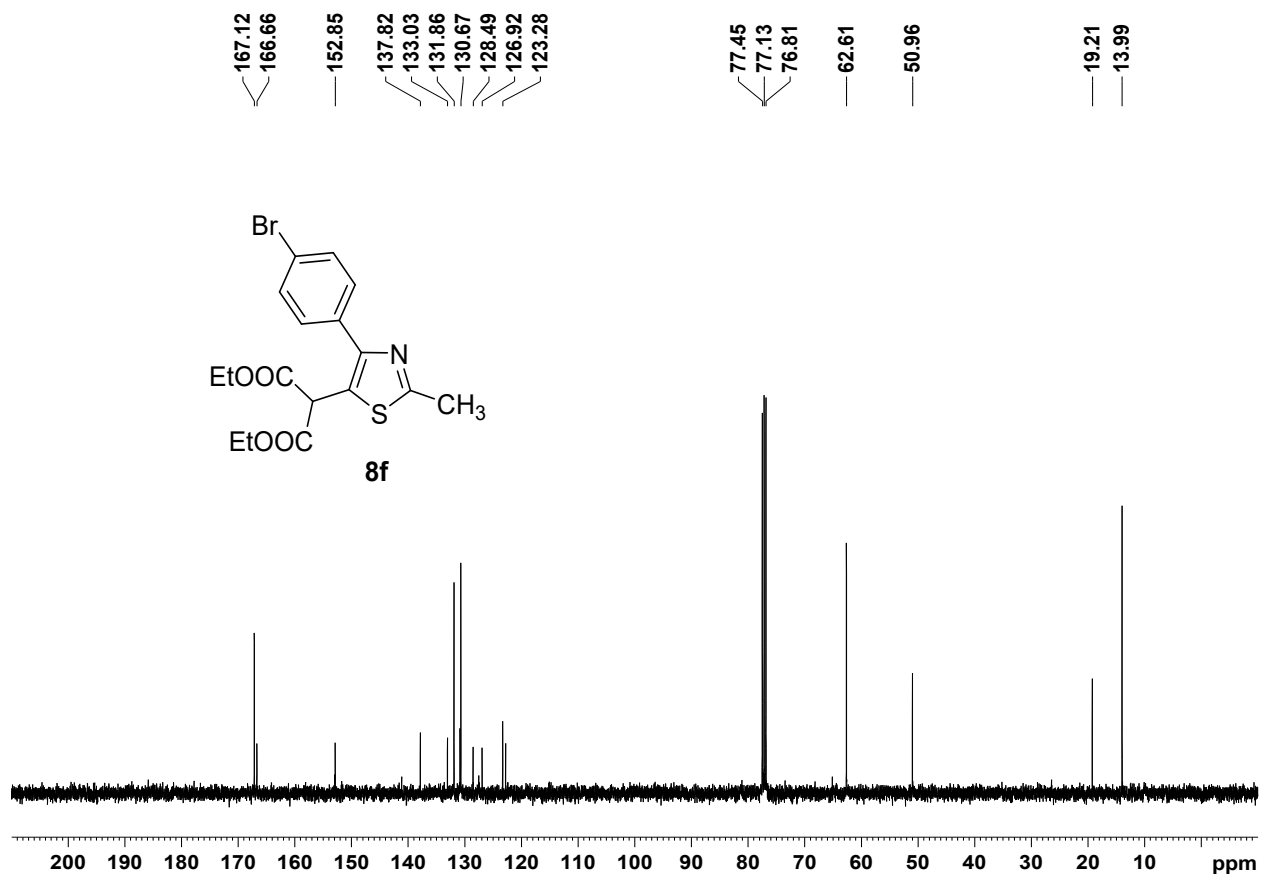

Figure 12. <sup>13</sup>C NMR (100 MHz, CDCl<sub>3</sub>) spectrum of **8f**

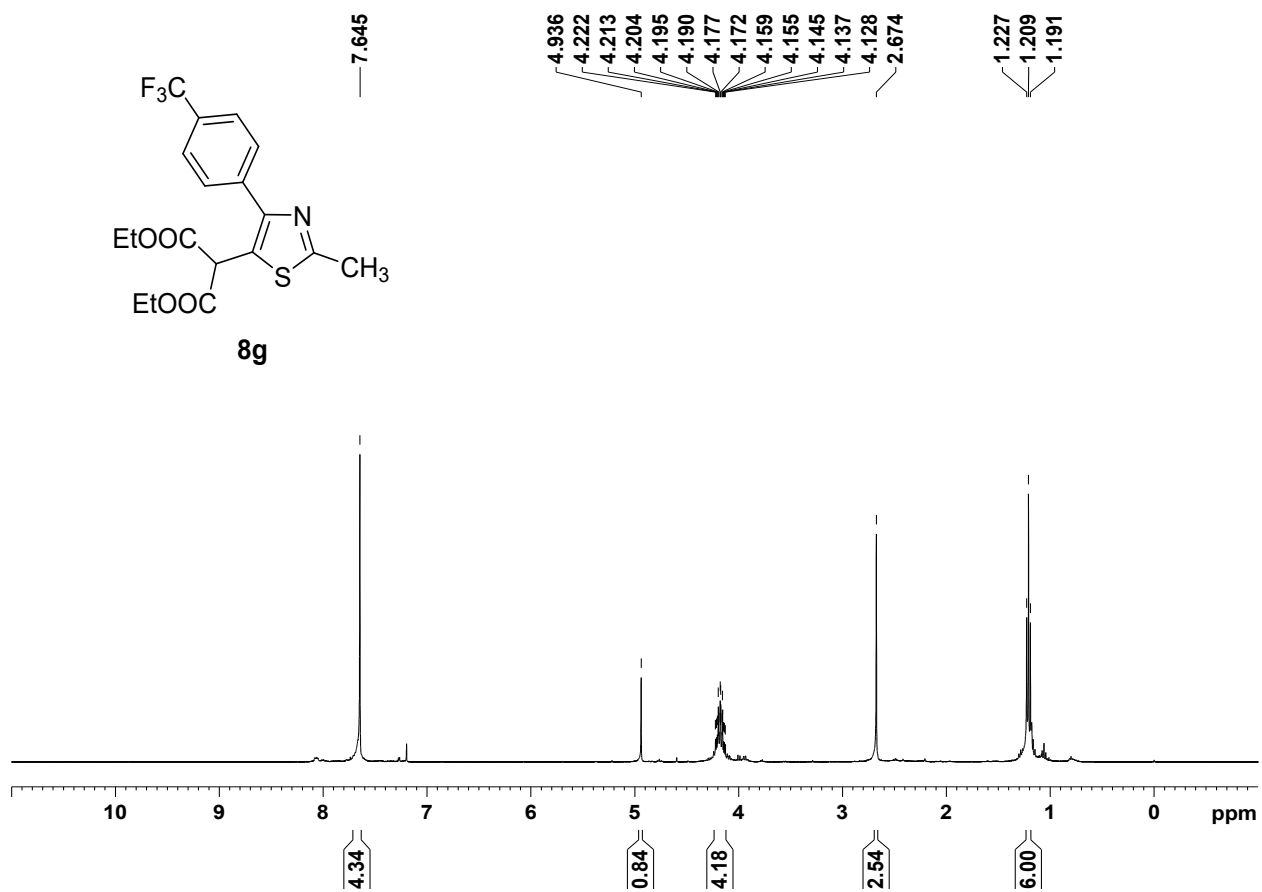

Figure 13. <sup>1</sup>H NMR (400 MHz, CDCl<sub>3</sub>) spectrum of **8g**

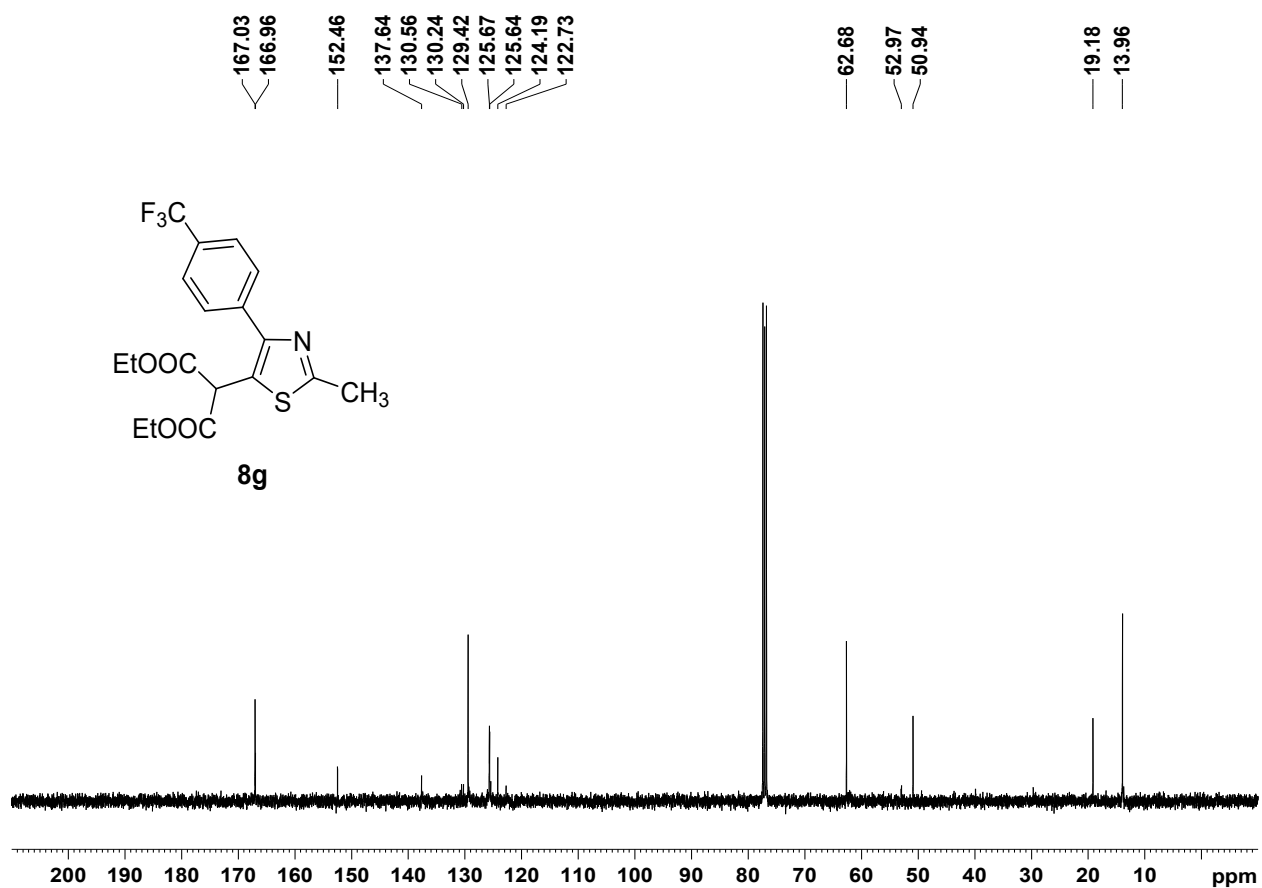

Figure 14. <sup>13</sup>C NMR (100 MHz, CDCl<sub>3</sub>) spectrum of **8g**

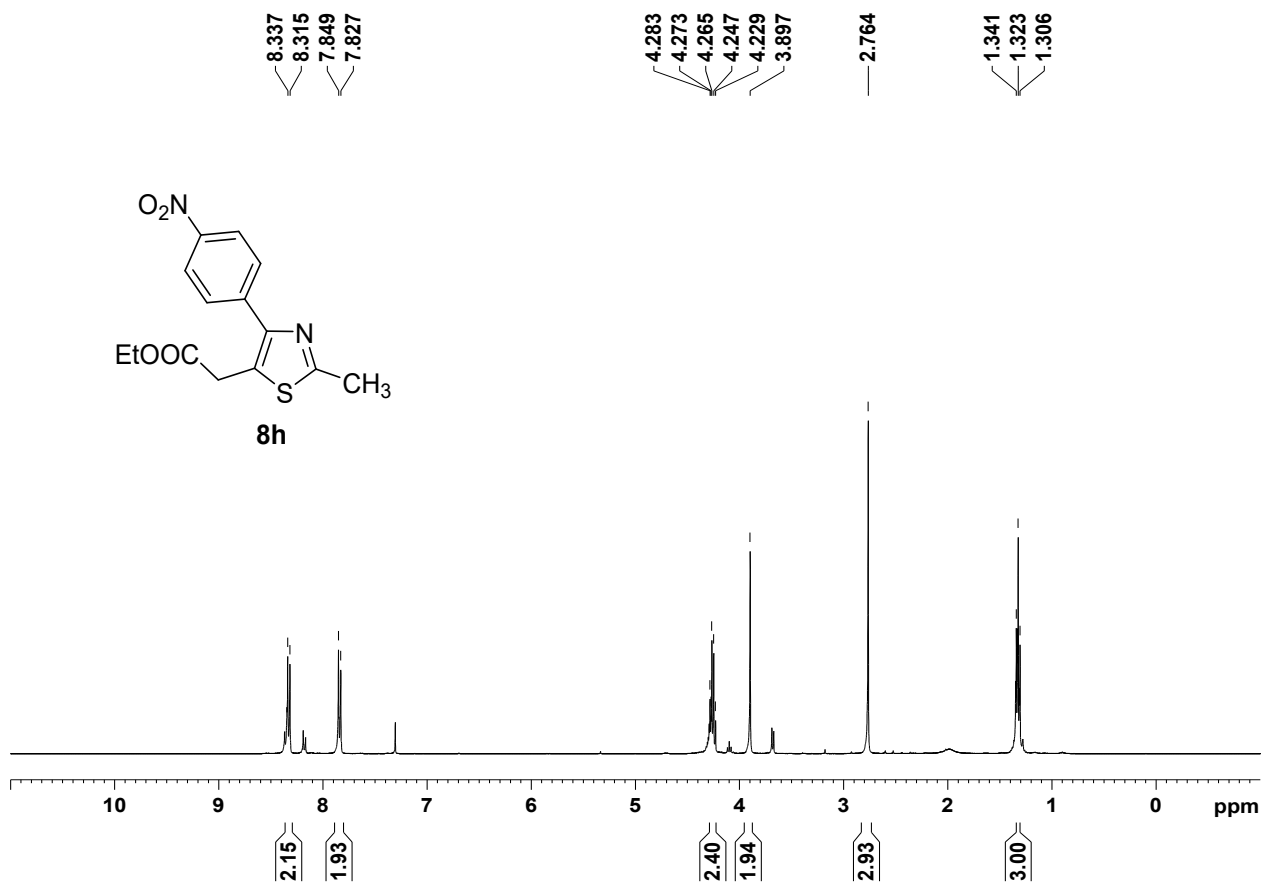

Figure 15. <sup>1</sup>H NMR (400 MHz, CDCl<sub>3</sub>) spectrum of **8h**



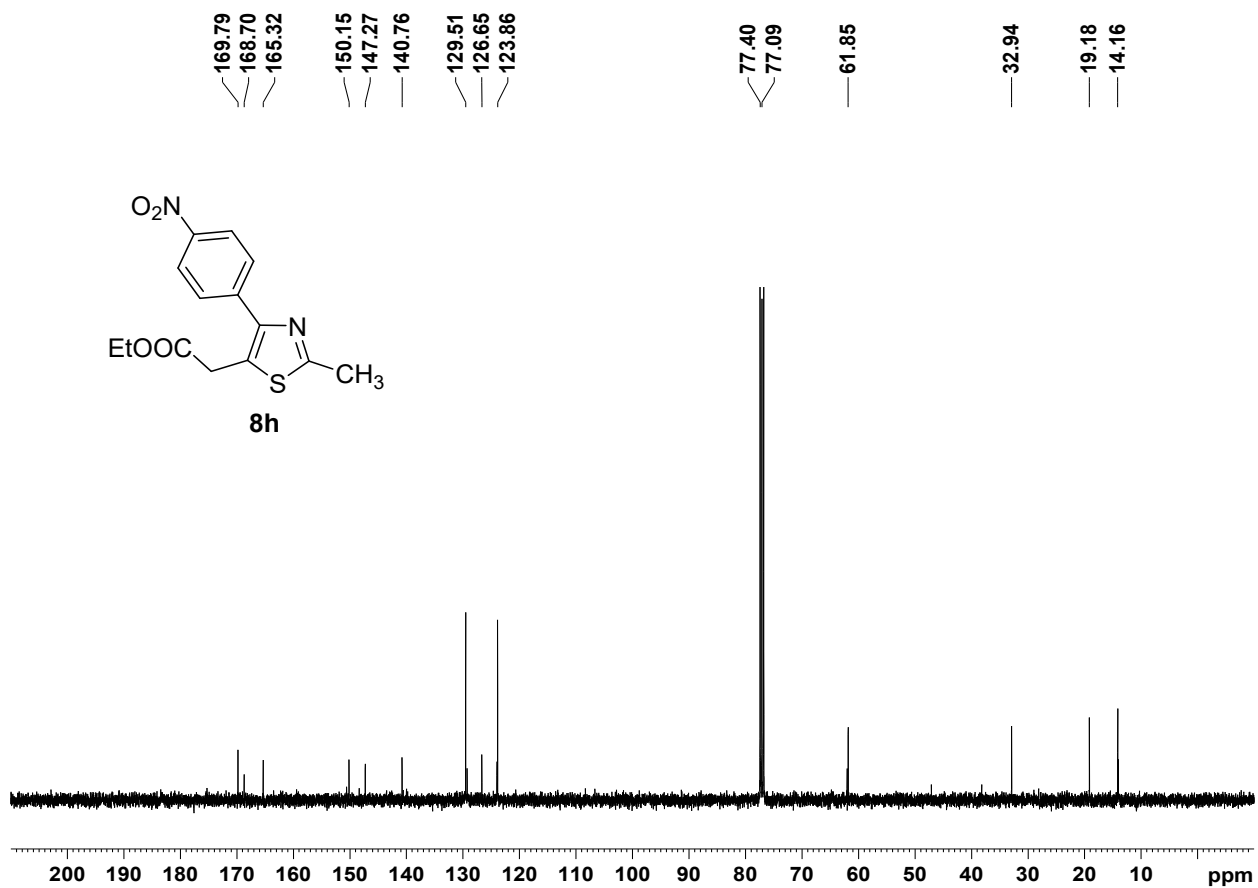

Figure 16. <sup>13</sup>C NMR (100 MHz, CDCl<sub>3</sub>) spectrum of **8h**

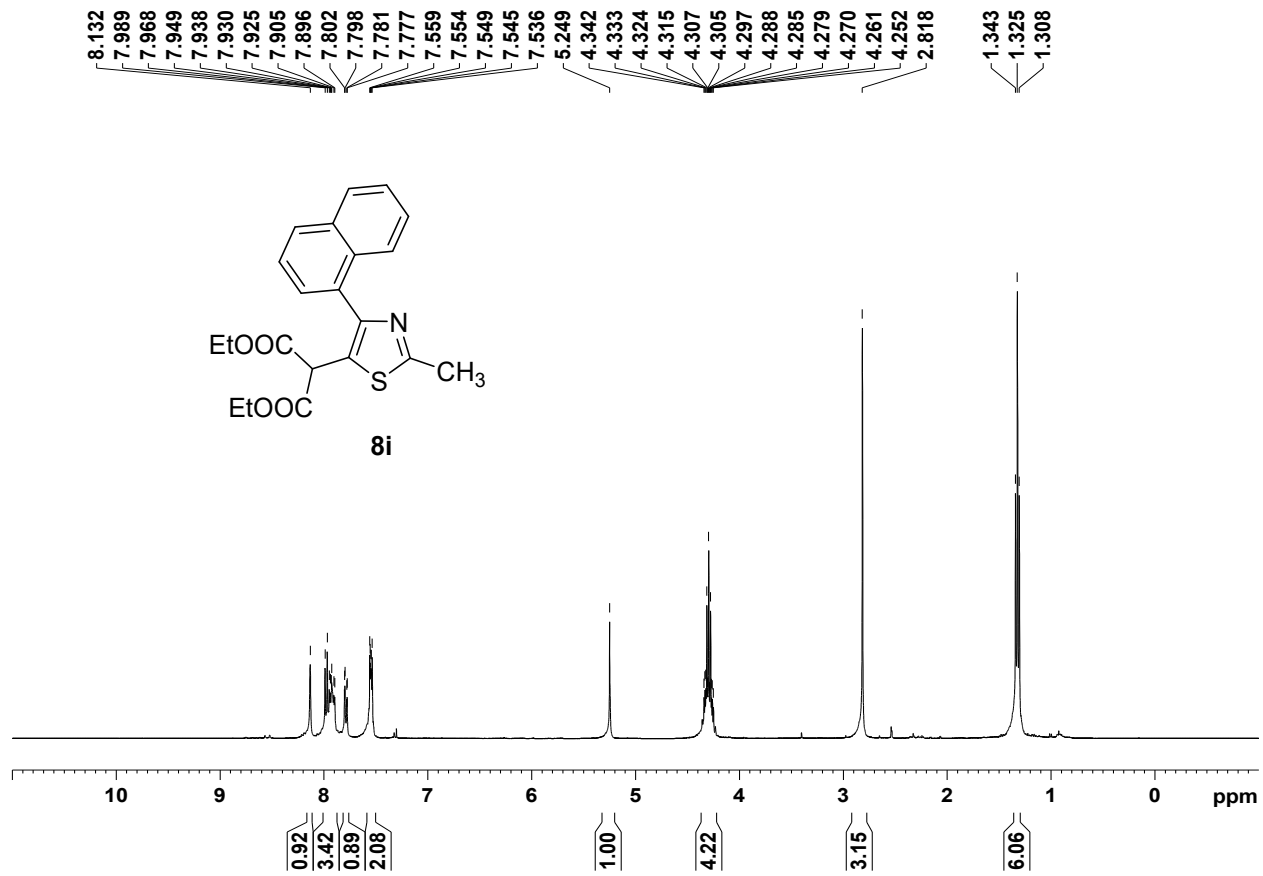

Figure 17. <sup>1</sup>H NMR (400 MHz, CDCl<sub>3</sub>) spectrum of **8i**

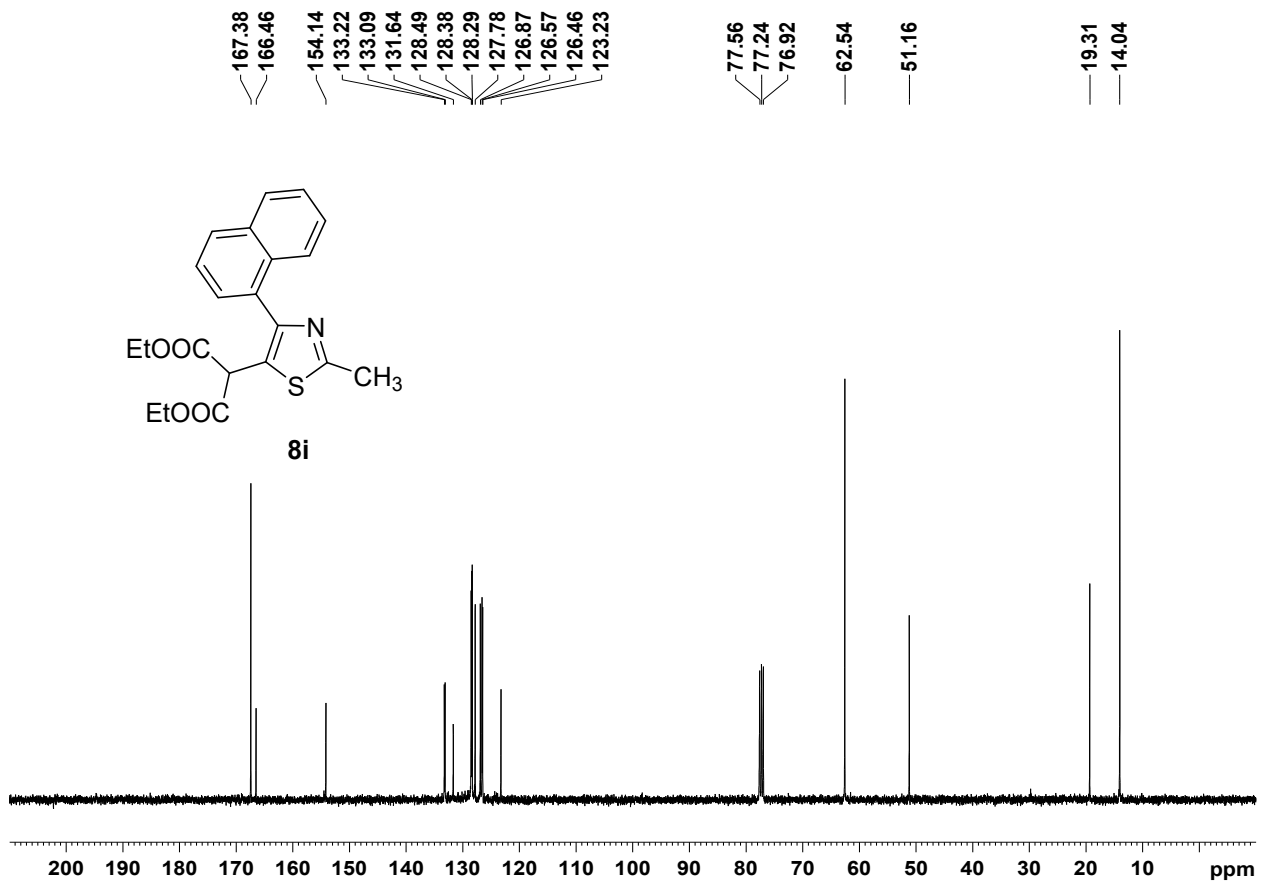

Figure 18.  $^{13}\text{C}$  NMR (100 MHz,  $\text{CDCl}_3$ ) spectrum of **8i**

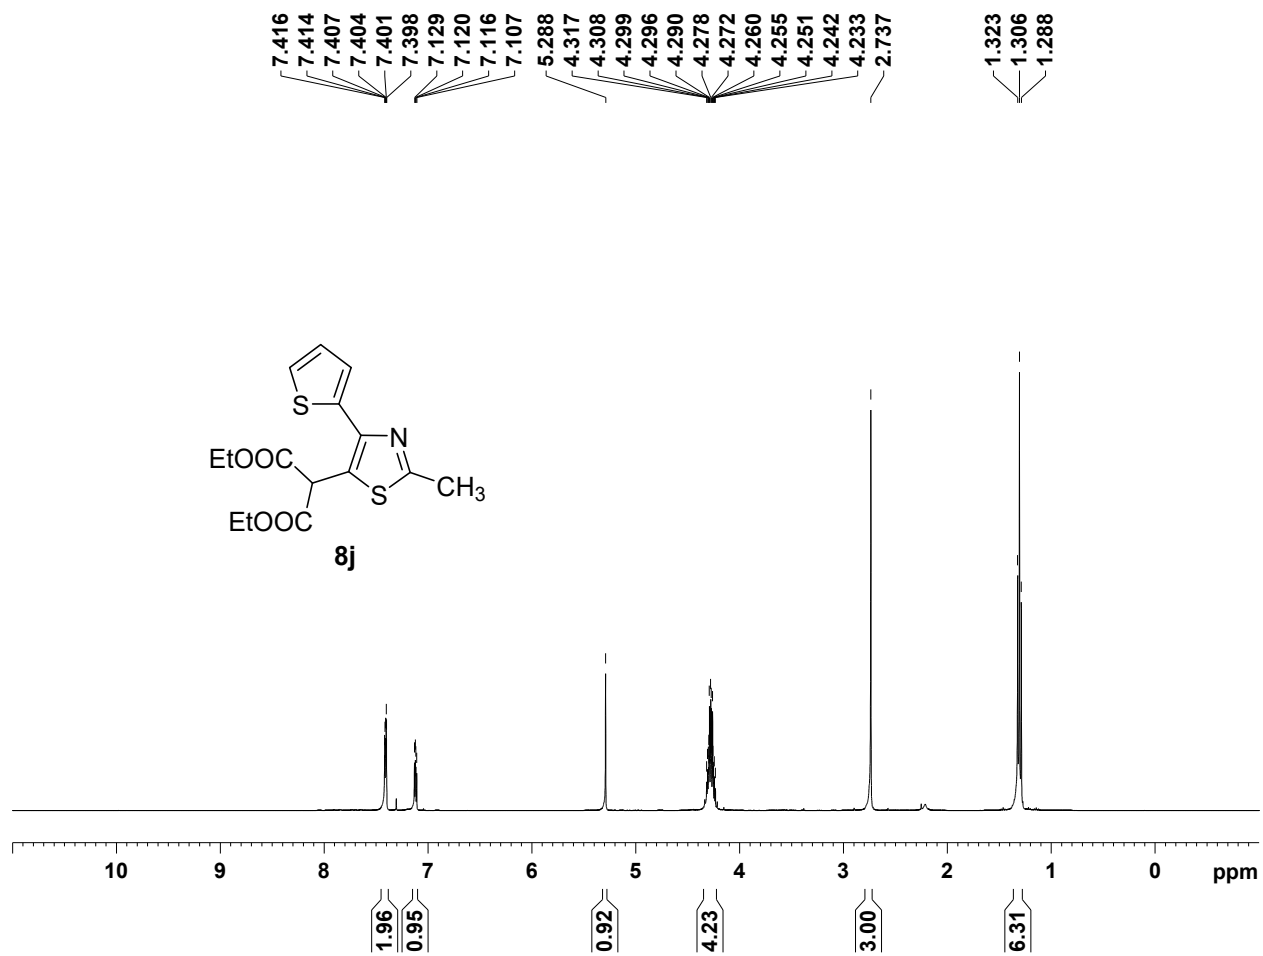

Figure 19. <sup>1</sup>H NMR (400 MHz, CDCl<sub>3</sub>) spectrum of **8j**

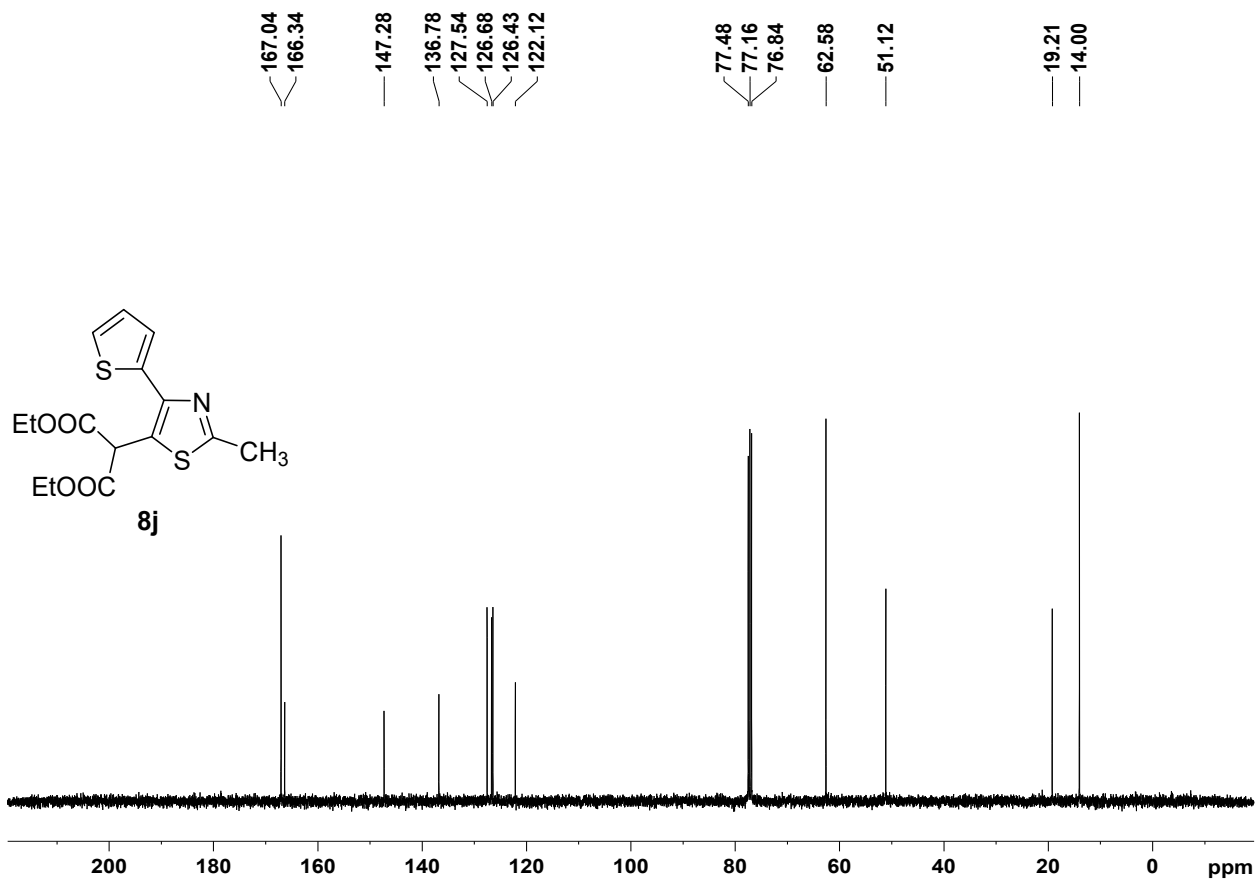

Figure 20. <sup>13</sup>C NMR (100 MHz, CDCl<sub>3</sub>) spectrum of **8j**

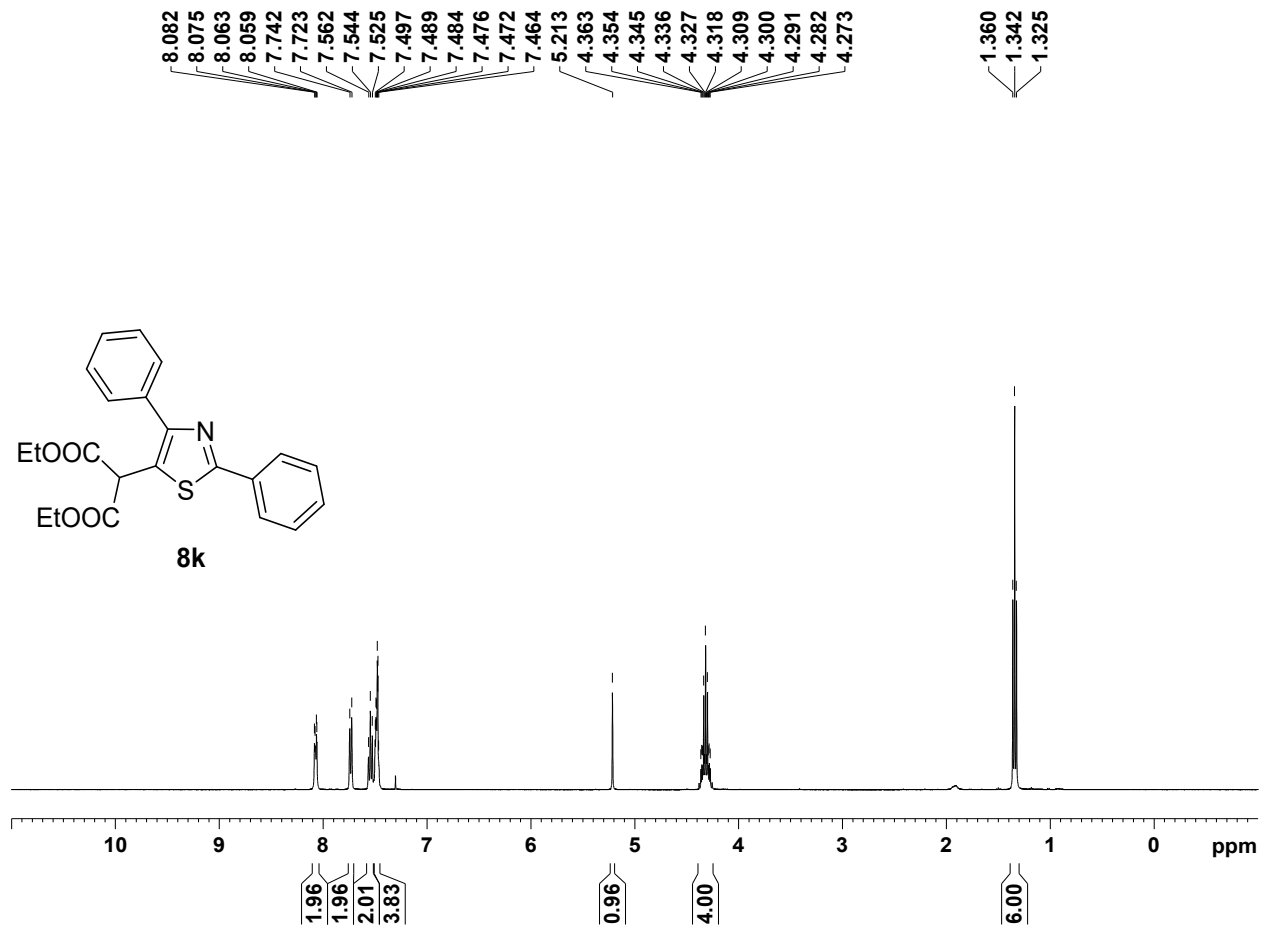

Figure 21. <sup>1</sup>H NMR (400 MHz, CDCl<sub>3</sub>) spectrum of **8k**

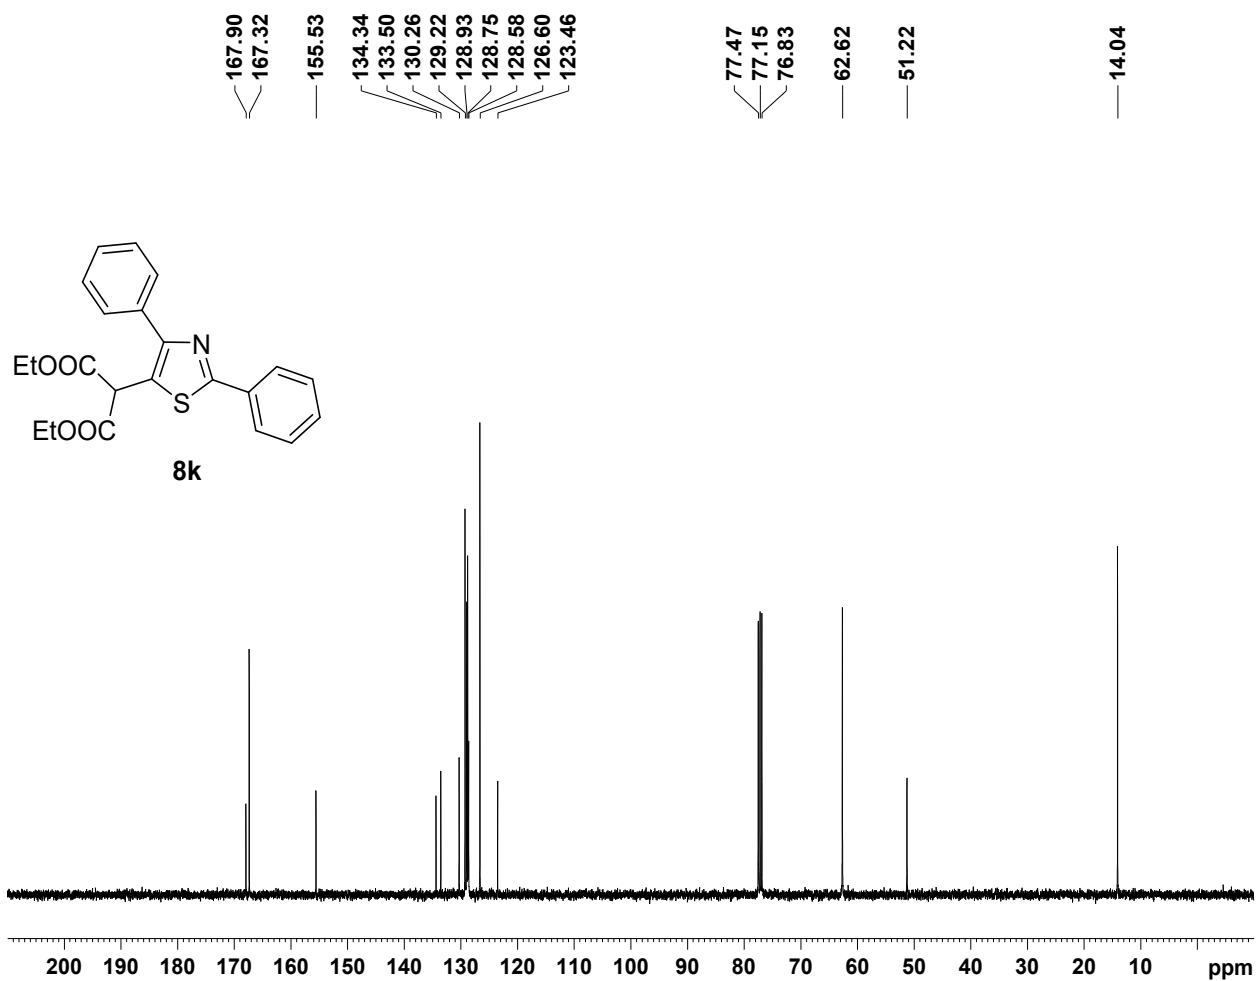

Figure 22. <sup>13</sup>C NMR (100 MHz, CDCl<sub>3</sub>) spectrum of **8k**

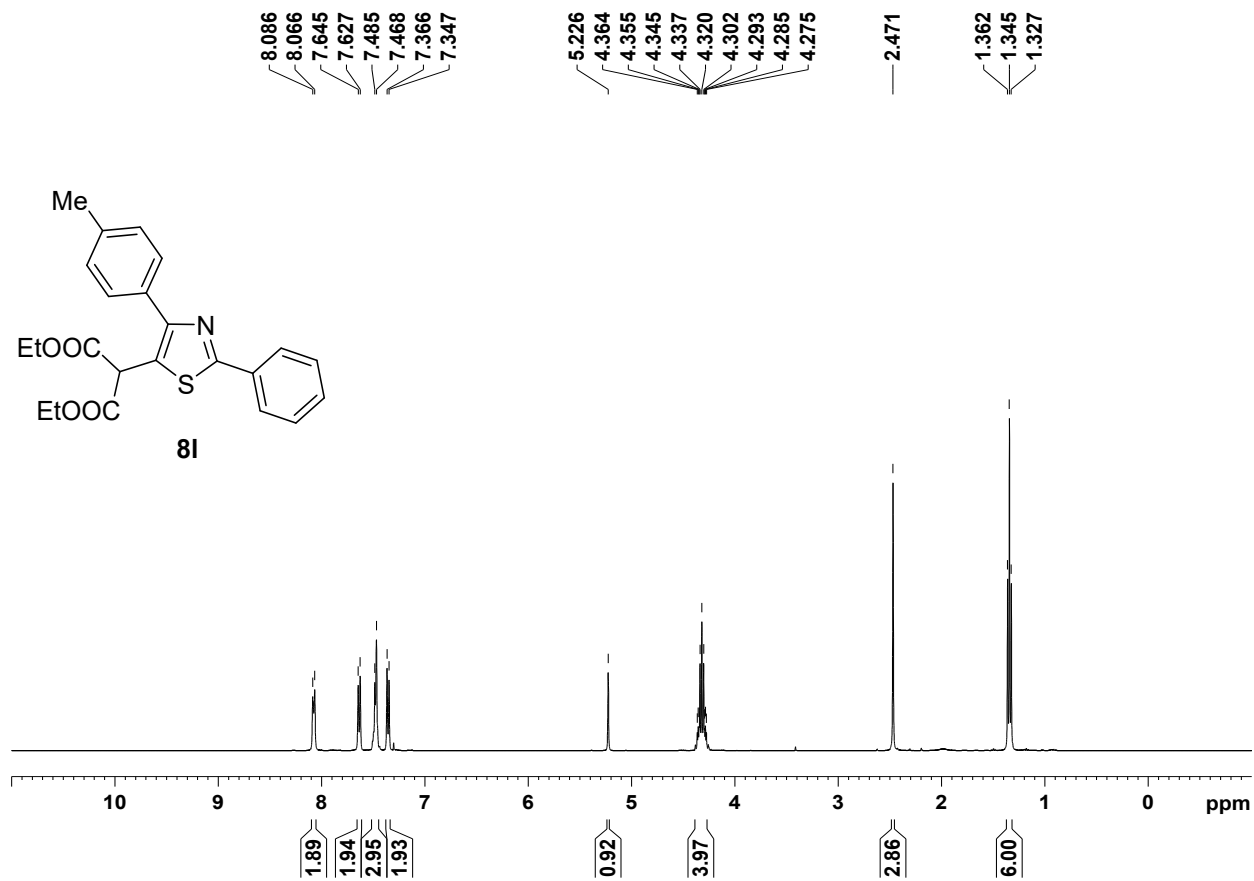

**Figure 23.** <sup>1</sup>H NMR (400 MHz, CDCl<sub>3</sub>) spectrum of **8I**



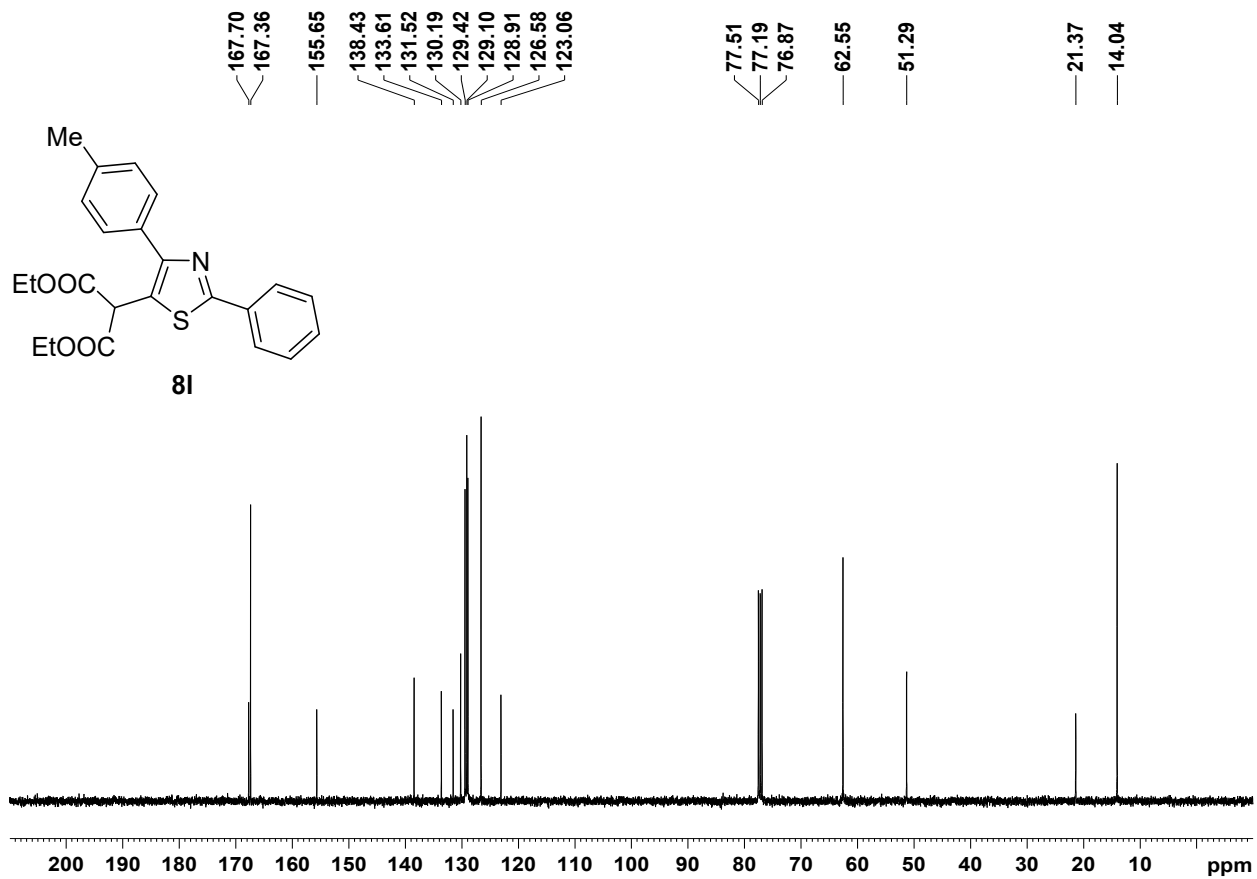

Figure 24. <sup>13</sup>C NMR (100 MHz, CDCl<sub>3</sub>) spectrum of **8I**

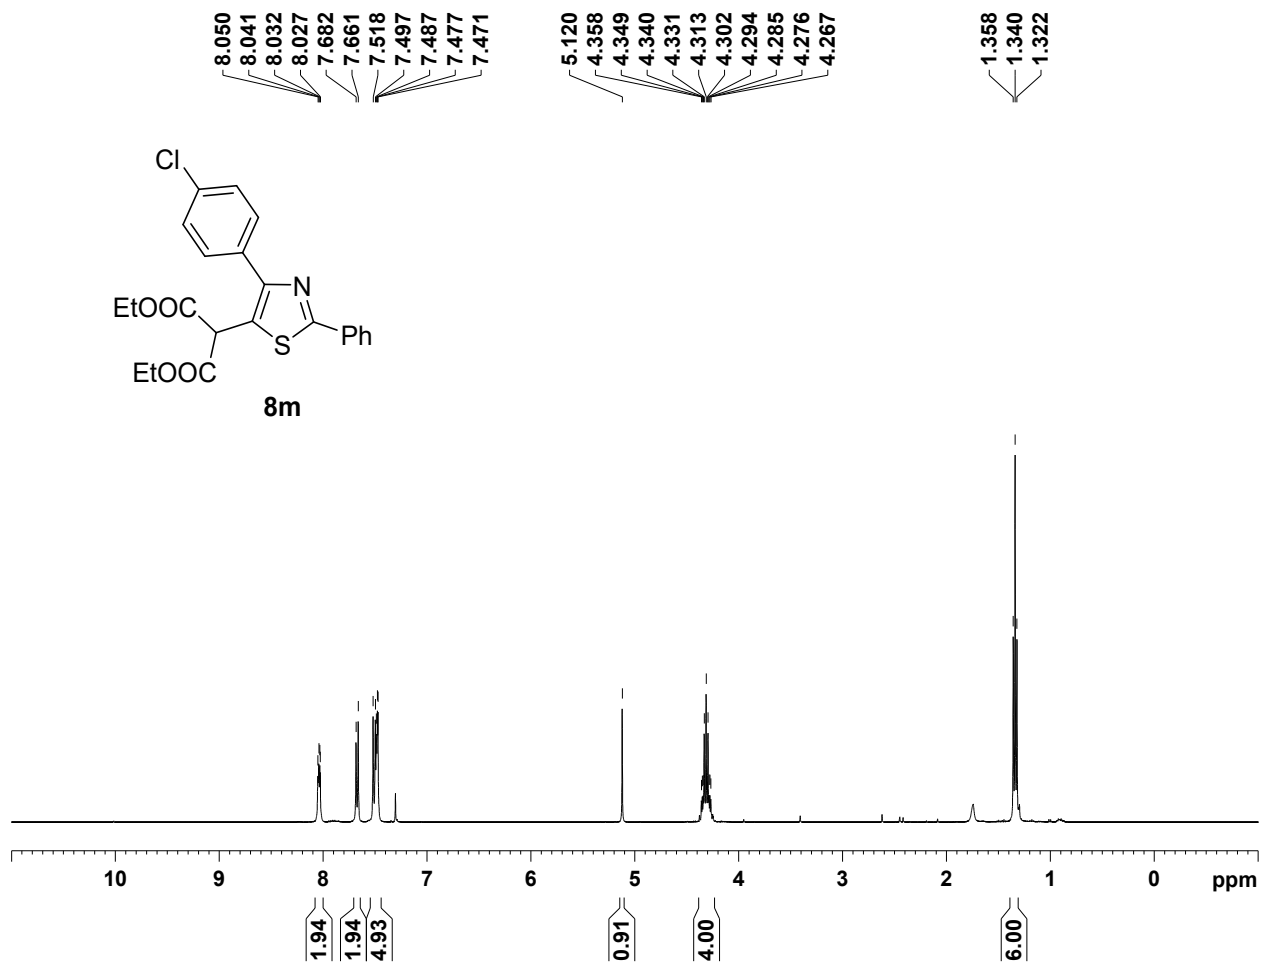

**Figure 25.** <sup>1</sup>H NMR (400 MHz, CDCl<sub>3</sub>) spectrum of **8m**

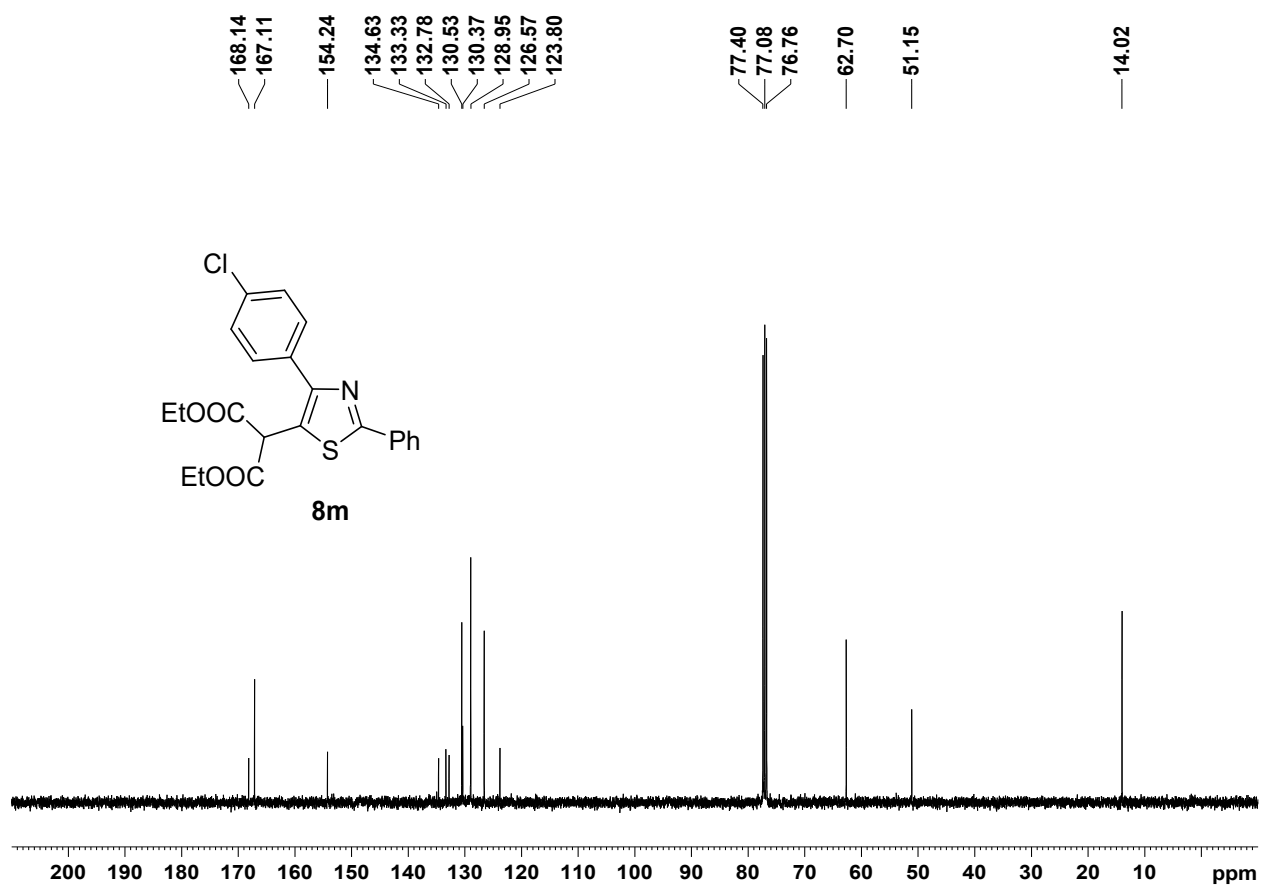

Figure 26.  $^{13}\text{C}$  NMR (100 MHz,  $\text{CDCl}_3$ ) spectrum of **8m**

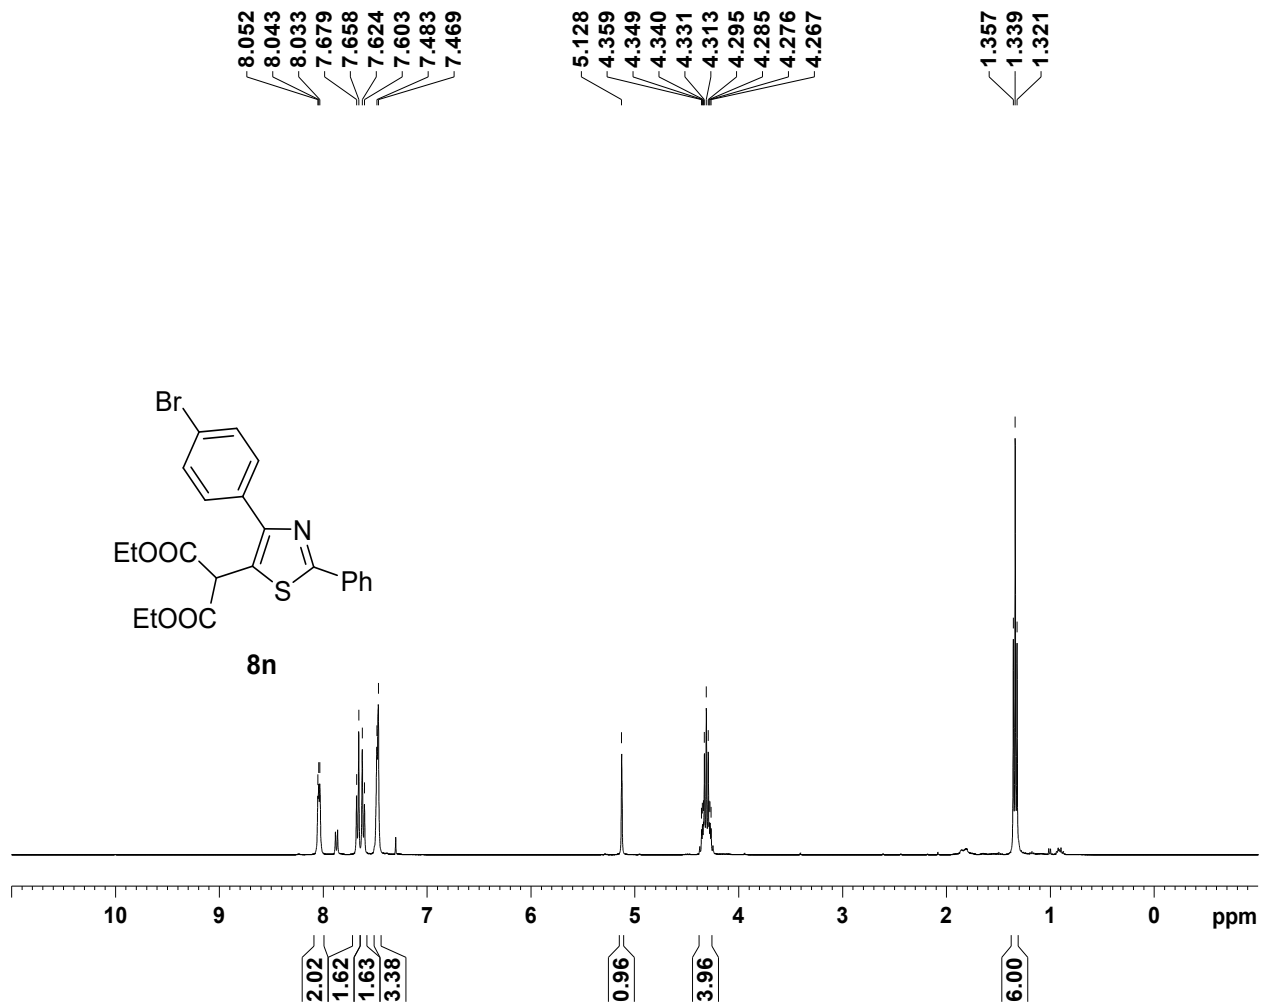

Figure 27. <sup>1</sup>H NMR (400 MHz, CDCl<sub>3</sub>) spectrum of **8n**

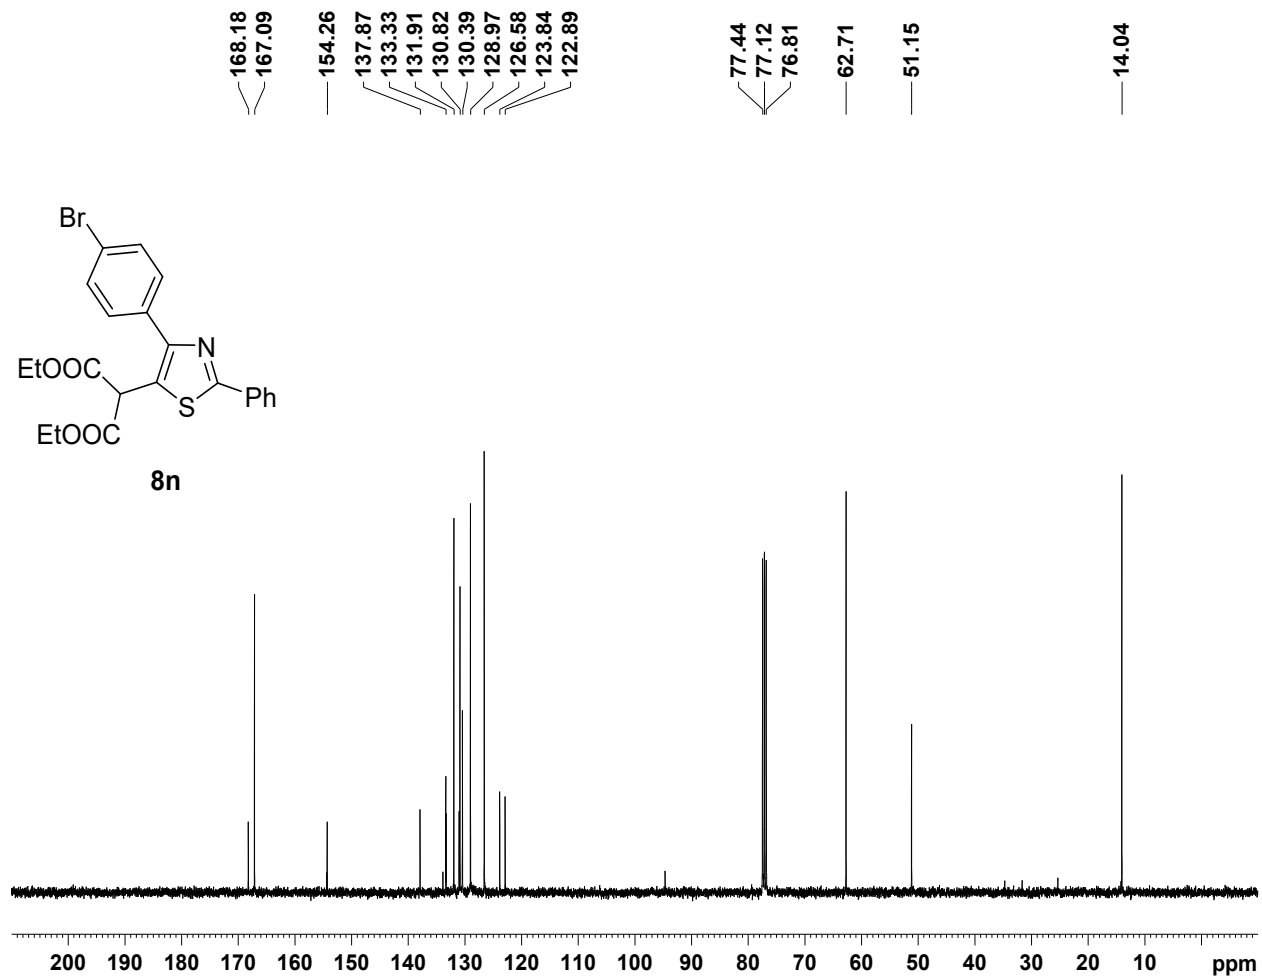

**Figure 28.** <sup>13</sup>C NMR (100 MHz, CDCl<sub>3</sub>) spectrum of **8n**

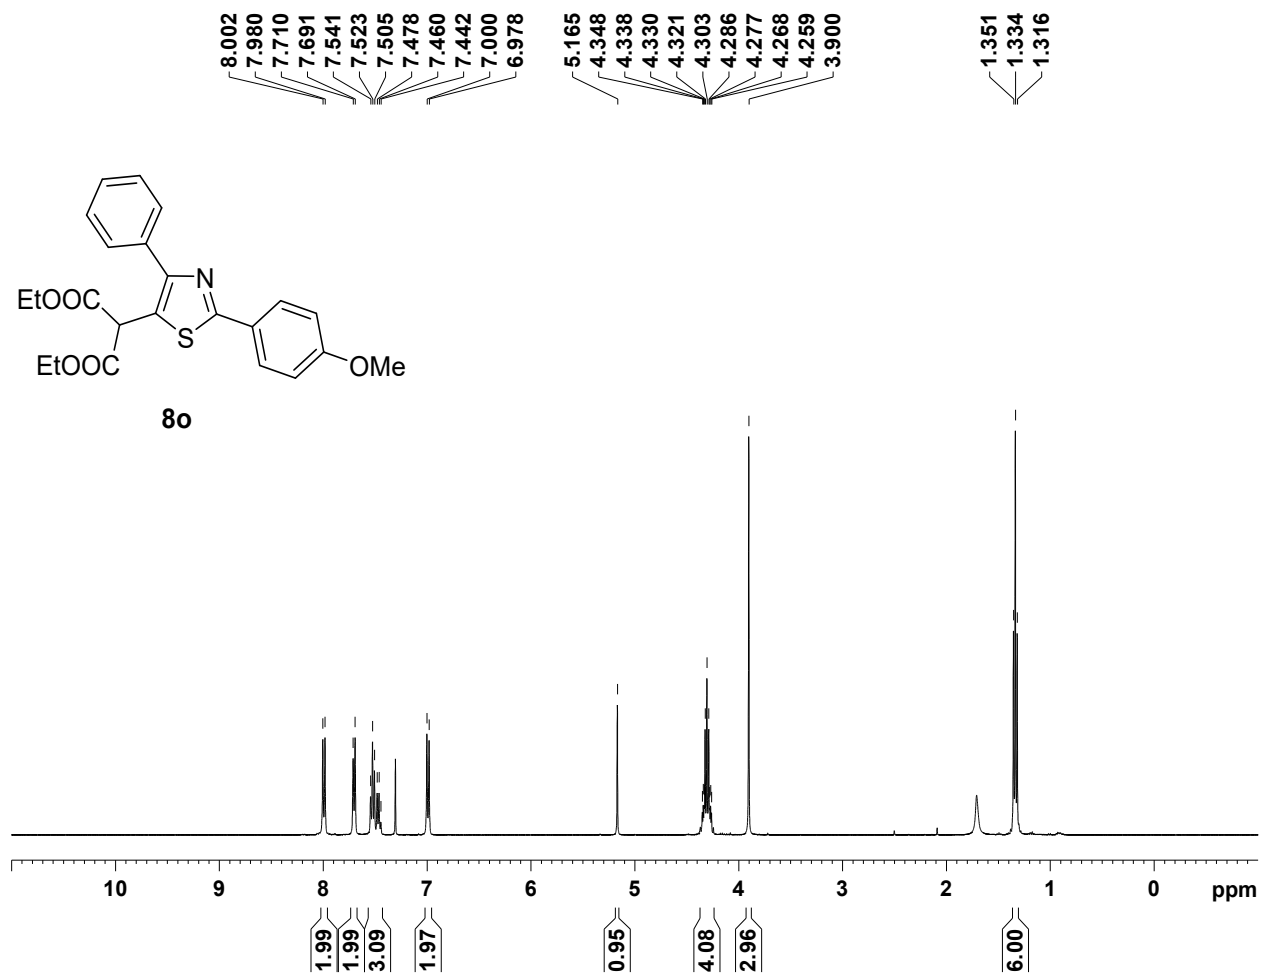

Figure 29. <sup>1</sup>H NMR (400 MHz, CDCl<sub>3</sub>) spectrum of **8o**

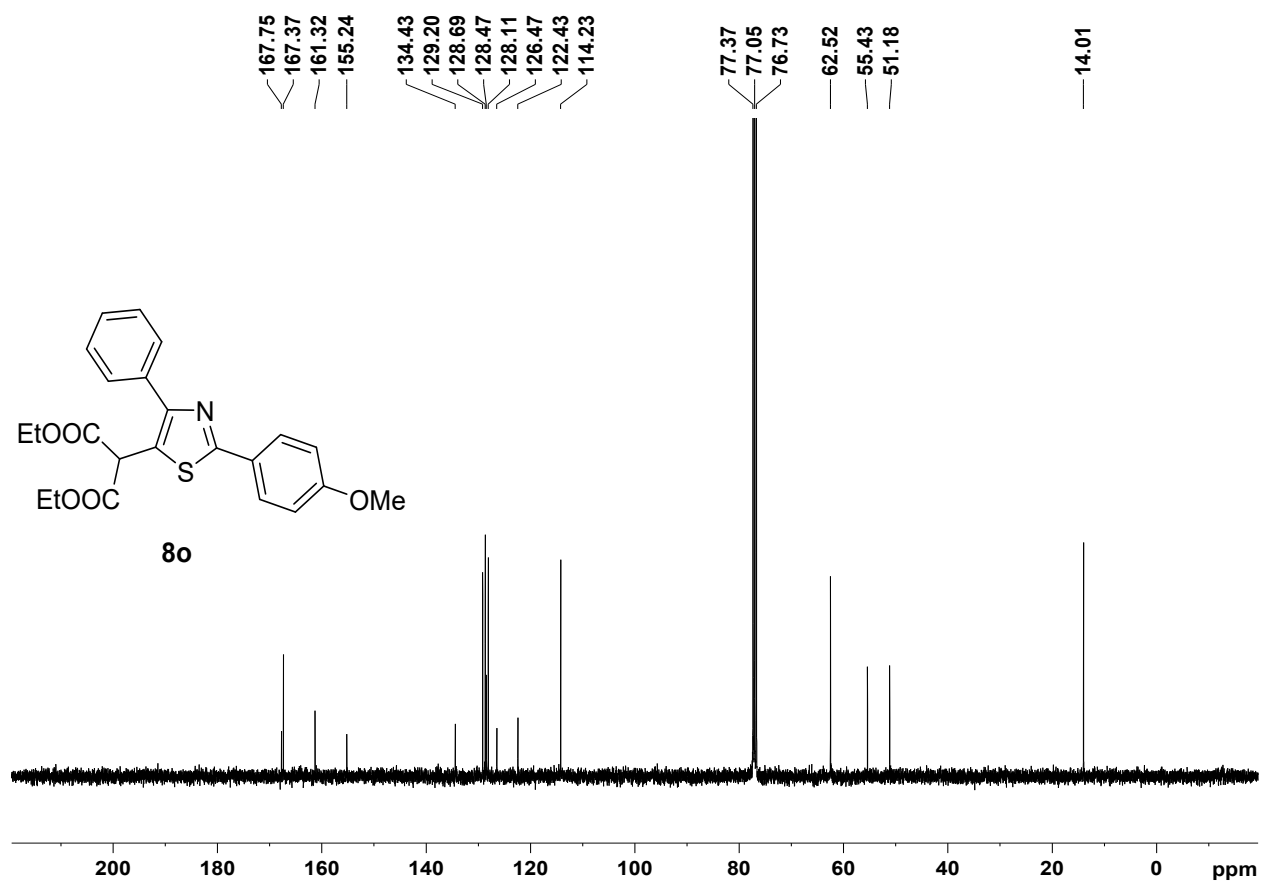

Figure 30.  $^{13}\text{C}$  NMR (100 MHz,  $\text{CDCl}_3$ ) spectrum of **8o**

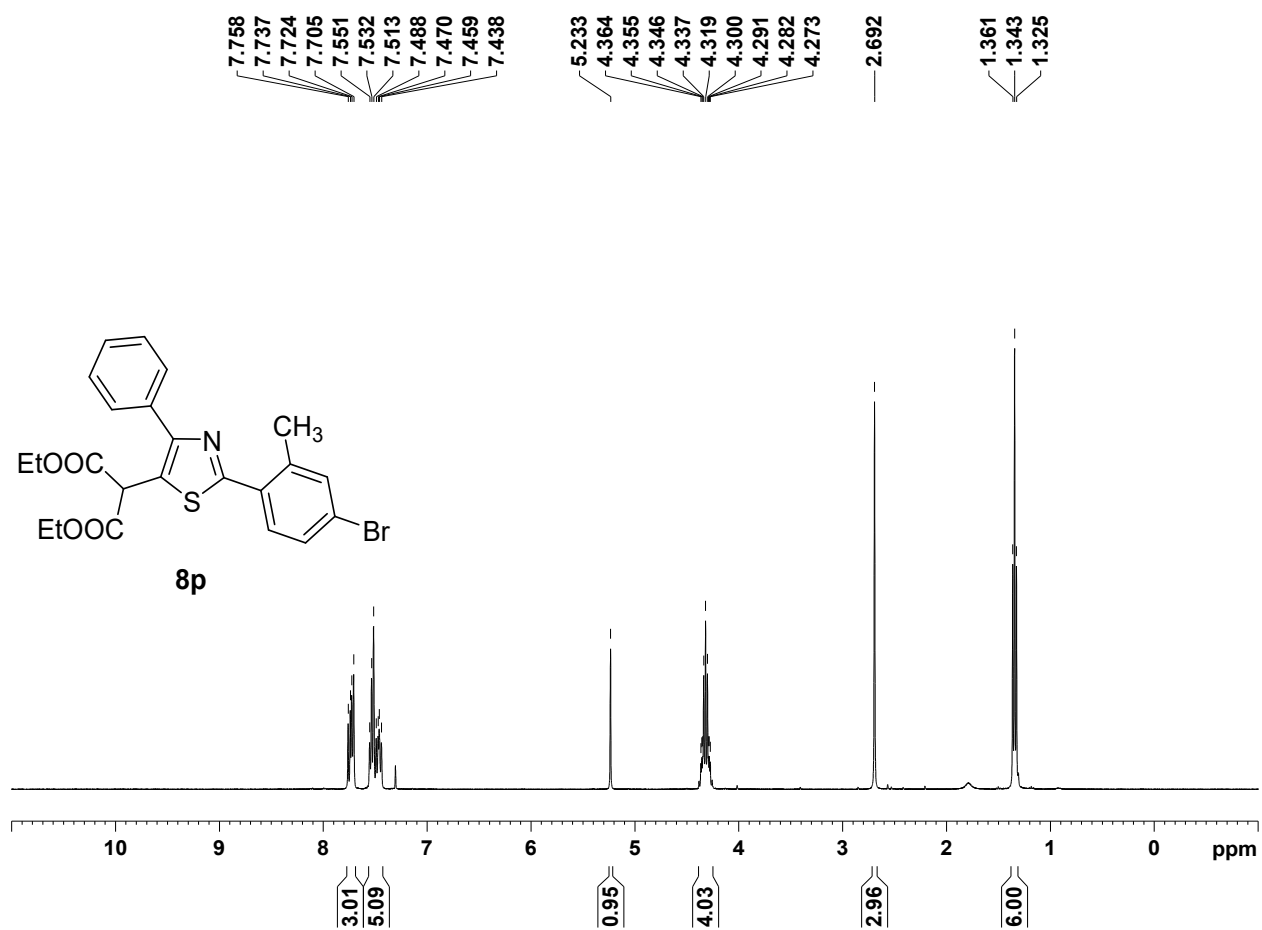

**Figure 31.** <sup>1</sup>H NMR (400 MHz, CDCl<sub>3</sub>) spectrum of **8p**



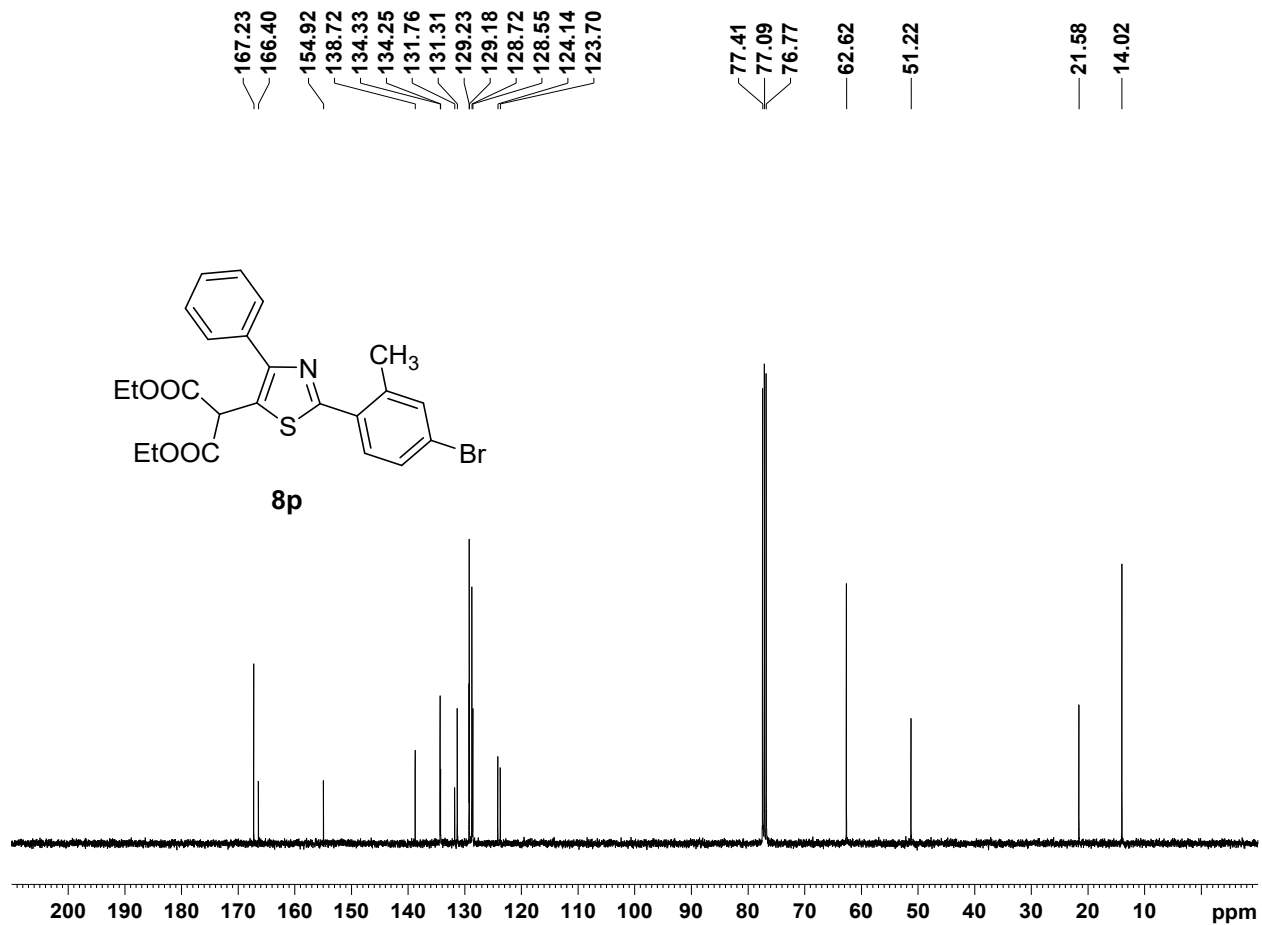

Figure 32.  $^{13}\text{C}$  NMR (100 MHz,  $\text{CDCl}_3$ ) spectrum of **8p**

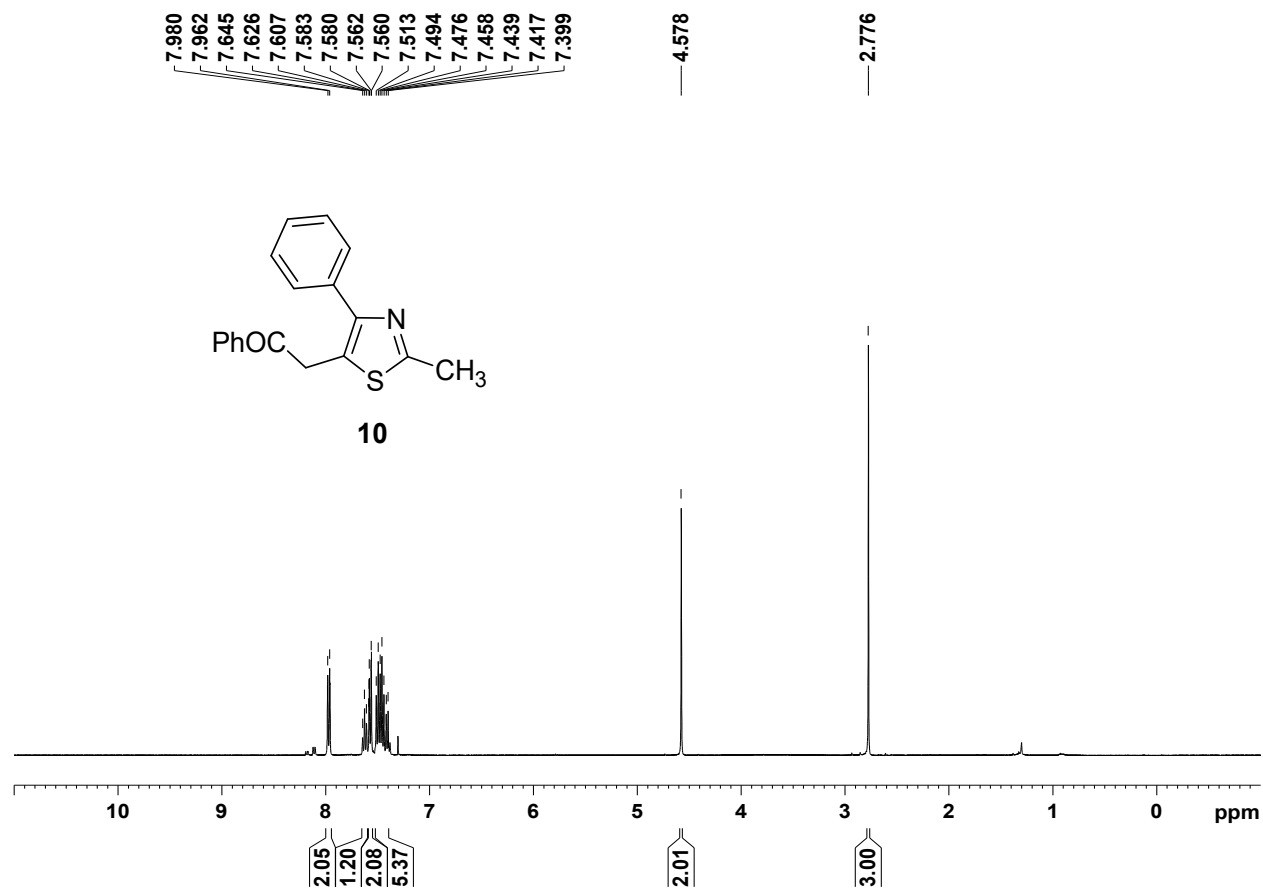

**Figure 33.** <sup>1</sup>H NMR (400 MHz, CDCl<sub>3</sub>) spectrum of **10**

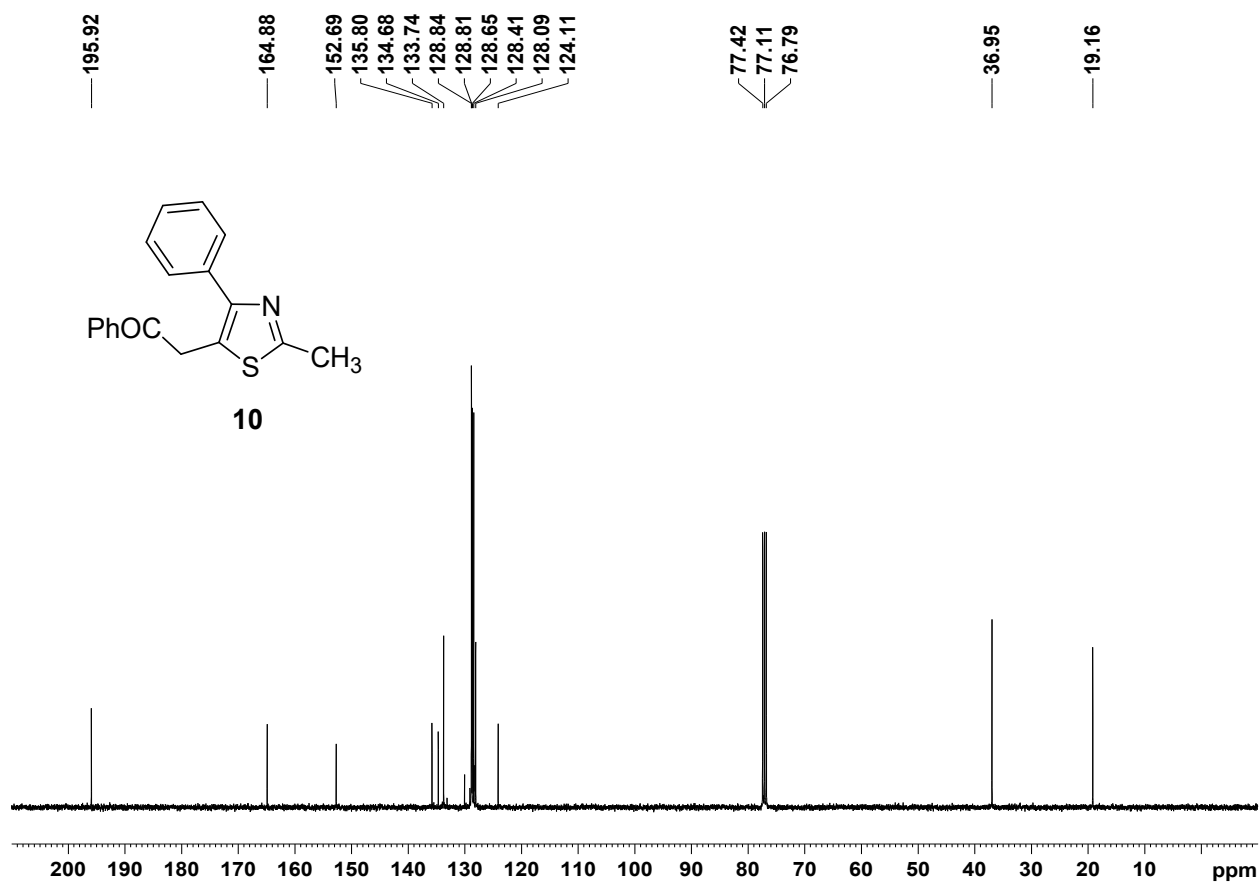

**Figure 34.**  $^{13}\text{C}$  NMR (100 MHz,  $\text{CDCl}_3$ ) spectrum of **10**

## B. X-ray structure of **8o**

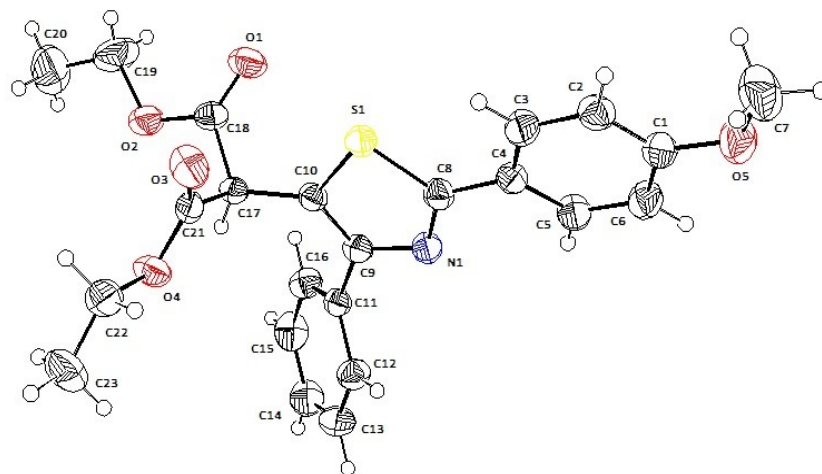

**Figure 1.** ORTEP plot of the crystal structure of **8o** (at 40% probability level)

**Crystal structure determination:** Single crystals suitable for X-ray studies were grown by recrystallization of **8o** from DCM/chloroform (1:9). X-ray data were collected on a CCD diffractometer using graphite-monochromated Mo-K $\alpha$  radiation.

**Table 1.** Selected crystal parameters and refinement metrics for **8o**

|                                   |                                                   |
|-----------------------------------|---------------------------------------------------|
| CCDC Number for <b>8o</b>         | 2201951                                           |
| Chemical formula                  | C <sub>23</sub> H <sub>23</sub> NO <sub>5</sub> S |
| Formula weight                    | 425.4990                                          |
| Crystal system                    | Monoclinic                                        |
| Space group                       | P 2 <sub>1</sub> /c                               |
| a (Å)                             | 9.7261 (9)                                        |
| b (Å)                             | 26.408 (3)                                        |
| c (Å)                             | 8.5437 (7)                                        |
| $\alpha$ (°)                      | 90                                                |
| $\beta$ (°)                       | 91.509 (3)                                        |
| $\gamma$ (°)                      | 90                                                |
| Volume (Å <sup>3</sup> )          | 2193.7 (2)                                        |
| Z                                 | 4                                                 |
| Reflections collected             | 3859                                              |
| R, wR2                            | 0.0924, 0.2053                                    |
| Goodness-of-fit on F <sup>2</sup> | 1.152                                             |
